# Supplementary material for: Interventions Associated With Reduced Loneliness and Social Isolation in Older Adults: A Systematic Review and Meta-analysis
Source: PubMed Central journal article supplement (PMC9577679; doi:10.1001/jamanetworkopen.2022.36676), 2022-10-17

## Supplemental Online Content

Hoang P, King JA, Moore S, et al. Interventions associated with reduced loneliness and social isolation in older adults: a systematic review and meta-analysis. *JAMA Netw Open*. 2022;5(10):e2236676.  
doi:10.1001/jamanetworkopen.2022.36676

**eTable 1.** Search Strategy

**eTable 2.** Cohen  $\kappa$  for Reviewed Abstracts

**eTable 3.** Estimating Methods for Cohen  $d$

### **eReferences**

**eTable 4.** Intervention and Control Group Characteristics of Included Studies

**eTable 5.** Reasons for Exclusion From Meta-analysis

**eTable 6.** Meta-analyses by Intervention and Sensitivity Analyses

**eTable 7.** GRADE Table of Included Studies

**eTable 8.** Risk of Bias Table of Included Studies

**eFigure 1.** Funnel Plot Analysis of Studies Included in Meta-analysis

**eFigure 2.** Risk of Bias Assessment of Studies Included in the Systematic Review

This supplemental material has been provided by the authors to give readers additional information about their work.

**eTable 1.** Search Strategy with for Each Corresponding Database

| <b>Database</b>                  | <b>Concept 1:<br/>older adult</b>                                                                                                | <b>Concept 2: social<br/>isolation OR loneliness</b> | <b>Concept 3: social<br/>intervention</b>                                                                                                                          | <b>Concept 4:<br/>technology</b>                                                                                             | <b>Concept 5:<br/>music therapy</b>              |
|----------------------------------|----------------------------------------------------------------------------------------------------------------------------------|------------------------------------------------------|--------------------------------------------------------------------------------------------------------------------------------------------------------------------|------------------------------------------------------------------------------------------------------------------------------|--------------------------------------------------|
| OVID/Medline MeSH terms          | aged/ OR<br>"aged, 80 and<br>over"/ OR<br>geriatrics/                                                                            | social isolation/ OR<br>loneliness/                  | social support/ OR<br>socialization/ OR<br>intergenerational<br>relations/ OR<br>psychosocial<br>support systems/                                                  | culturally<br>appropriate<br>technology/<br>OR biomedical<br>technology/<br>OR<br>educational<br>technology/<br>OR internet/ | music therapy/                                   |
| CINAHL MeSH terms*               | MH "aged" OR<br>MH "frail<br>elderly" OR<br>MH "aged, 80<br>and over" OR<br>MH "geriatrics"<br>OR MH<br>"gerontological<br>care" | MH "social isolation" OR<br>MH "loneliness"          | (MH "social<br>networking" OR MH<br>"social participation"<br>OR MH<br>"socialization" OR<br>MH "community<br>programs" OR MH<br>"intergenerational<br>relations") | MH<br>"educational<br>technology"                                                                                            | MH "music<br>therapy" OR MH<br>"pet therapy"     |
| CENTRAL (Cochrane)<br>MeSH terms | aged/ OR<br>geriatrics/                                                                                                          | social isolation/ OR<br>loneliness/                  | social support/ OR<br>socialization/                                                                                                                               | educational<br>technology/<br>OR internet/                                                                                   | music therapy/                                   |
| Embase MeSH terms                | aged/ OR<br>"institutionalize<br>d adult"/ OR<br>geriatrics/                                                                     | social isolation/ OR<br>loneliness/                  | social support/ OR<br>socialization/ OR<br>social network/ OR<br>psychosocial care/                                                                                | educational<br>technology/<br>OR internet/                                                                                   | music therapy/                                   |
| PsychINFO MeSH terms             | aging/ OR<br>geriatrics/                                                                                                         | social isolation/ OR<br>loneliness/                  | social programs/<br>OR social support/<br>OR social network/<br>OR socialization/<br>OR<br>intergenerational<br>relations/ OR                                      | internet/ OR<br>groupware/                                                                                                   | music therapy/<br>OR animal<br>assisted therapy/ |

therapeutic social  
clubs/

---

|                                      |                                                                                                      |                                                                 |                                                                                                                                   |                                           |                                 |
|--------------------------------------|------------------------------------------------------------------------------------------------------|-----------------------------------------------------------------|-----------------------------------------------------------------------------------------------------------------------------------|-------------------------------------------|---------------------------------|
| Web of Science                       | No MeSH terms available                                                                              |                                                                 |                                                                                                                                   |                                           |                                 |
| Scopus                               | No MeSH terms available                                                                              |                                                                 |                                                                                                                                   |                                           |                                 |
| Search terms used for all databases† | older adult OR senior citizen OR elder OR elder* OR geriatric OR gerontol* OR grandparent OR retire* | loneliness OR alone* OR social isolation OR emotional isolation | (social* OR psychosocial OR community OR intergeneration*) adj3 (support* OR intervention* OR involve* OR therap* OR participat*) | technology OR computer OR mobile OR phone | music therapy OR animal therapy |

---

\*CINAHL was searched via only MeSH terms.

†Where relevant, proximity indicators were adapted according to the specific database.

MeSH: Medical Subject Headings

**eTable 2.** Cohen's kappa for reviewed abstracts

| Author Group        | Cohen's Kappa |
|---------------------|---------------|
| P.H. and J.M.       | 0.5975        |
| J.M. and S.M.       | 0.50649       |
| K.R. and H.S.       | 0.53290       |
| C.T. and P.H.       | 0.63159       |
| P.H. and K.M./J.M.* | 0.57479       |
| P.H. and C.W./J.M.* | 0.775925      |

\*Average was taken of the two authors with P.H.

**eTable 3:** Estimated methods for Cohen’s *d* (effect sizes)

| Study                                | N*        |         | RMD   | SMD   | Estimated method <sup>1</sup>                                                         | compute.es procedure <sup>1</sup> | Notes                                                                                          |
|--------------------------------------|-----------|---------|-------|-------|---------------------------------------------------------------------------------------|-----------------------------------|------------------------------------------------------------------------------------------------|
|                                      | Treatment | Control |       |       |                                                                                       |                                   |                                                                                                |
| <b>Animals</b>                       |           |         |       |       |                                                                                       |                                   |                                                                                                |
| Jessen et al, <sup>75</sup> 1996     | 20        | 20      | +0.80 | +0.25 | Imputed change in SDs from mean correlation coefficient of other studies <sup>2</sup> | mes                               |                                                                                                |
| Sollami, et al, <sup>73</sup> 2017   | 14        | 14      | −8.43 | −2.95 | Mean changes and SDs provided in study                                                | mes                               | Two intervention groups were not separated out for analysis as variations of same intervention |
| Banks and Banks, <sup>70</sup> 2002  | 30        | 15      | N/A   | −0.72 | <i>F</i> -value from ANCOVA provided in study                                         | fes                               |                                                                                                |
| Banks, and Banks, <sup>71</sup> 2005 | 17        | 16      | +2.81 | +1.49 | Mean changes and SDs provided in study                                                | mes                               | Both groups received a different type of the intervention.                                     |
| Banks et al, <sup>72</sup> 2008      | 25        | 13      | N/A   | −2.09 | <i>F</i> -value from ANOVA provided in study                                          | fes                               | Two intervention groups were not separated out for analysis as variations of same intervention |
| Robinson et al, <sup>74</sup> 2013   | 17        | 17      | −7.67 | −1.11 | Adjusted mean changes and SDs provided in study                                       | mes                               |                                                                                                |
| <b>Therapy</b>                       |           |         |       |       |                                                                                       |                                   |                                                                                                |

|                                   |     |     |       |       |                                                                                                               |     |                                                                                                                                                           |
|-----------------------------------|-----|-----|-------|-------|---------------------------------------------------------------------------------------------------------------|-----|-----------------------------------------------------------------------------------------------------------------------------------------------------------|
| Jarvis et al, <sup>110</sup> 2019 | 13  | 17  | -2.49 | -1.50 | Mean changes and SDs provided in study                                                                        | mes |                                                                                                                                                           |
| Theeke et al, <sup>111</sup> 2016 | 15  | 12  | -0.81 | -0.79 | F-value from ANOVA provided in study                                                                          | fes |                                                                                                                                                           |
| Parry et al, <sup>65</sup> 2016   | 151 | 162 | +0.21 | +0.10 | Mean differences and 95% CIs provided. Estimated SD from 95% confidence intervals for each group <sup>2</sup> | mes | For De Jong De Jong Gierveld Scale                                                                                                                        |
| Parry et al, <sup>65</sup> 2016   | 151 | 162 | +0.69 | +0.16 | Mean differences and 95% CIs provided. Estimated SD from 95% confidence intervals for each group <sup>2</sup> | mes | For Lubben Social Network Scale                                                                                                                           |
| Huang et al, <sup>59</sup> 2011   | 60  | 60  | +1.47 | +0.32 | Imputed change in SDs from mean correlation coefficient of other studies <sup>2</sup>                         | mes | Excluded arm that had both cognitive behavioural therapy and Tai Chi. Social satisfaction went down in both groups, but magnitude larger in control group |
| Nelson et al, <sup>112</sup> 2019 | 25  | 23  | -2.08 | -0.18 | SMD and associated 95% confidence intervals provided in study                                                 | N/A |                                                                                                                                                           |
| Li et al, <sup>63</sup> 2018      | 61  | 122 | N/A   | +0.41 | p-value from multilevel model provided in study                                                               | pes | Exact p-value not provided, so upper limit used                                                                                                           |
| <b>Combined</b>                   |     |     |       |       |                                                                                                               |     |                                                                                                                                                           |
| Boen et al, <sup>57</sup> 2012    | 37  | 52  | +0.17 | +0.12 | SMD provided in study                                                                                         | des |                                                                                                                                                           |

|                                       |     |     |        |       |                                                                                       |     |                                                                    |
|---------------------------------------|-----|-----|--------|-------|---------------------------------------------------------------------------------------|-----|--------------------------------------------------------------------|
| Li et al, <sup>60</sup> 2018          | 61  | 122 | N/A    | +0.41 | <i>p</i> -value from mixed effect modelling provided in study                         | pes | Exact <i>p</i> -value not provided, so upper limit used            |
| Huang et al, <sup>59</sup> 2011       | 56  | 60  | N/A    | +0.32 | Imputed change in SDs from mean correlation coefficient of other studies <sup>2</sup> | mes |                                                                    |
| Gustafson et al, <sup>76</sup> 2019   | 14  | 11  | -0.19  | -0.54 | SMD provided in study                                                                 | des | No loneliness improvement in treatment, just increase in controls  |
| Tse et al, <sup>108</sup> 2012        | 296 | 239 | -3.59  | -0.32 | Mean changes and SDs provided in study                                                | mes |                                                                    |
| Tse et al, <sup>109</sup> 2013        | 48  | 42  | -13.10 | -0.72 | <i>p</i> -value from independent-sample <i>t</i> test provided in study               | pes | Exact <i>p</i> -value not provided, so upper limit used            |
| Saito et al, <sup>77</sup> 2012       | 20  | 37  | -1.40  | -0.73 | <i>p</i> -value from linear mixed model provided in study                             | pes |                                                                    |
| Markle-Reid et al, <sup>64</sup> 2006 | 120 | 122 | -5.26  | -0.35 | Mean changes and SDs provided in study                                                | mes |                                                                    |
| Kapan et al, <sup>58</sup> 2017       | 34  | 32  | -1.30  | -0.04 | <i>p</i> -value from ANCOVA provided in study                                         | pes |                                                                    |
| Wan et al, <sup>91</sup> 2017         | 57  | 52  | +0.20  | +0.29 | Mean changes and SDs provided in study                                                | mes | No actual change in intervention group, just a decrease in control |
| <b>Counselling</b>                    |     |     |        |       |                                                                                       |     |                                                                    |
| Chow et al, <sup>81</sup> 2019        | 68  | 33  | -0.24  | -0.18 | SMD provided in study                                                                 | des |                                                                    |
| Kremers et al, <sup>84</sup> 2006     | 36  | 62  | -1.30  | -0.37 | Calculated change in SDs from correlation                                             | mes | Correlation coefficients based on                                  |

|                                           |     |     |        |       |                                                                                                               |     |                                 |
|-------------------------------------------|-----|-----|--------|-------|---------------------------------------------------------------------------------------------------------------|-----|---------------------------------|
|                                           |     |     |        |       | coefficients provided in study <sup>2</sup>                                                                   |     | Wilcoxon signed rank tests      |
| Mountain et al, <sup>83</sup> 2017        | 121 | 117 | -0.70  | -0.29 | <i>p</i> -value from adjusted mean difference provided in study                                               | pes |                                 |
| Routasalo et al, <sup>85</sup> 2009       | 117 | 118 | 0.00   | 0.00  | Mean differences and 95% CIs provided. Estimated SD from 95% confidence intervals for each group <sup>2</sup> | mes |                                 |
| Alaviani et al, <sup>86</sup> 2015        | 65  | 75  | -13.10 | -3.79 | Imputed change in SDs from mean correlation coefficient of other studies <sup>2</sup>                         | mes |                                 |
| Cohen-Mansfield et al, <sup>82</sup> 2018 | 35  | 28  | -0.33  | -0.24 | SMD provided in study                                                                                         | des |                                 |
| <b>Exercise</b>                           |     |     |        |       |                                                                                                               |     |                                 |
| Tse et al, <sup>78</sup> 2012             | 296 | 239 | -3.59  | -0.32 | Mean changes and SDs provided in study                                                                        | mes |                                 |
| Tse et al, <sup>80</sup> 2016             | 32  | 18  | -6.30  | -0.79 | Imputed change in SDs from mean correlation coefficient of other studies <sup>2</sup>                         | mes |                                 |
| Kapan et al, <sup>58</sup> 2017           | 34  | 32  | -1.30  | -0.04 | <i>p</i> -value from ANCOVA provided in study                                                                 | pes |                                 |
| Huang et al, <sup>59</sup> 2011           | 56  | 60  | N/A    | +0.32 | <i>F</i> -value from mixed effect modelling provided in study                                                 | fes |                                 |
| Ehlers et al, <sup>87</sup> 2017          | 45  | 124 | N/A    | -0.19 | SMD provided in study                                                                                         | des | SMD based on mean latent change |



|                                      |     |     |       |       |                                                                                                       |     |                                                                    |
|--------------------------------------|-----|-----|-------|-------|-------------------------------------------------------------------------------------------------------|-----|--------------------------------------------------------------------|
| Baez et al, <sup>88</sup> 2017       | 20  | 16  | +0.91 | +0.44 | Raw data available for download to estimate mean changes and SDs                                      | mes |                                                                    |
| Wang et al, <sup>91</sup> 2010       | 7   | 10  | +0.27 | +0.30 | Mean changes and SDs provided in study                                                                | mes |                                                                    |
| Jones et al, <sup>89</sup> 2019      | 29  | 26  | -0.60 | -0.35 | SMD provided in study                                                                                 | des |                                                                    |
| Chan et al, <sup>90</sup> 2017       | 20  | 15  | -1.40 | -0.60 | SMD provided in study                                                                                 | des |                                                                    |
| Jansons et al, <sup>67</sup> 2017    | 46  | 39  | -0.40 | -0.12 | Raw data available for download to estimate mean changes and SDs                                      | mes |                                                                    |
| Wan et al, <sup>60</sup> 2017        | 57  | 52  | +0.20 | +0.29 | Mean changes and SDs provided in study                                                                | mes | No actual change in intervention group, just a decrease in control |
| <b>Music</b>                         |     |     |       |       |                                                                                                       |     |                                                                    |
| Giovagnoli et al, <sup>66</sup> 2018 | 22  | 21  | +1.17 | +0.07 | Adjusted mean changes and SDs provided in study                                                       | mes |                                                                    |
| Yap et al, <sup>69</sup> 2017        | 16  | 15  | N/A   | -0.36 | <i>p</i> -value from generalized linear model using generalized estimating equation provided in study | pes |                                                                    |
| Johnson et al, <sup>92</sup> 2020    | 187 | 170 | -2.20 | -0.34 | SMD provided in study                                                                                 | des | SMD is using estimation for Hedges' <i>g</i>                       |
| <b>Occupational therapy</b>          |     |     |       |       |                                                                                                       |     |                                                                    |

|                                         |     |     |       |       |                                                                                                |     |                                                                 |
|-----------------------------------------|-----|-----|-------|-------|------------------------------------------------------------------------------------------------|-----|-----------------------------------------------------------------|
| Larsson et al, <sup>94</sup> 2016       | 14  | 14  | N/A   | -1.37 | F-value from repeated measures ANOVA provided in study                                         | fes |                                                                 |
| De Craen et al, <sup>93</sup> 2006      | 143 | 154 | 0.00  | 0.00  | Mean changes and SEs (used to calculate SD) provided                                           | mes |                                                                 |
| <b>Reminiscence therapy</b>             |     |     |       |       |                                                                                                |     |                                                                 |
| Chiang et al, <sup>95</sup> 2009        | 45  | 47  | -7.33 | -1.20 | Imputed change in SDs from mean correlation coefficient of other studies <sup>2</sup>          | mes |                                                                 |
| Westerhof et al, <sup>96</sup> 2017     | 28  | 23  | +0.20 | +0.41 | SMD provided in study                                                                          | des | Both intervention and control group saw reduction in loneliness |
| Moieni et al, 2020 <sup>97</sup>        | 38  | 35  | N/A   | -0.70 | t-statistic provided in study                                                                  | tes |                                                                 |
| <b>Social</b>                           |     |     |       |       |                                                                                                |     |                                                                 |
| Hartke and King, <sup>101</sup> 2003    | 43  | 45  | -0.98 | -0.22 | t-statistic provided in study                                                                  | tes |                                                                 |
| Rook et al, <sup>98</sup> 2003          | 20  | 27  | -0.55 | -0.13 | Imputed change in SDs from mean correlation coefficient of other studies <sup>2</sup>          | mes | Only included foster grandparent arm of the study               |
| Mountain et al, <sup>99</sup> 2014      | 26  | 30  | +0.60 | +0.32 | Estimated p-value from 95% CIs for the adjusted mean difference provided in study <sup>3</sup> | pes |                                                                 |
| Charlesworth et al, <sup>102</sup> 2008 | 93  | 97  | -0.17 | -0.09 | p-value from generalized linear                                                                | pes |                                                                 |

|                                       |     |     |       |       |                                                                                                           |       |                                                                                                          |
|---------------------------------------|-----|-----|-------|-------|-----------------------------------------------------------------------------------------------------------|-------|----------------------------------------------------------------------------------------------------------|
|                                       |     |     |       |       | model provided in study                                                                                   |       |                                                                                                          |
| MacIntyre et al, <sup>61</sup> 1999   | 12  | 10  | +5.48 | +1.02 | Mean changes and SDs provided in study                                                                    | mes   |                                                                                                          |
| Andersson et al, <sup>100</sup> 1985  | 35  | 22  | +0.15 | +0.31 | Estimated SDs from <i>p</i> -values for the first and second measurements within both groups <sup>2</sup> | mes   |                                                                                                          |
| <b>Technology</b>                     |     |     |       |       |                                                                                                           |       |                                                                                                          |
| Czaja et al, <sup>104</sup> 2018      | 135 | 120 | N/A   | -0.17 | SMD provided in study                                                                                     | des   | SMD is specific to the 6-month follow-up                                                                 |
| Tsai et al, <sup>108</sup> 2011       | 27  | 28  | -6.34 | -0.96 | $\chi^2$ from generalized estimating equation provided in study                                           | chies |                                                                                                          |
| Tsai et al, <sup>109</sup> 2020       | 20  | 20  | -4.80 | -1.95 | $\chi^2$ from generalized estimating equation provided in study                                           | chies |                                                                                                          |
| Gustafson et al, <sup>76</sup> 2019   | 14  | 11  | -0.19 | -0.54 | SMD provided in study                                                                                     | des   |                                                                                                          |
| Sidner et al, <sup>106</sup> 2018     | 26  | 10  | N/A   | +0.05 | <i>p</i> -value from ANOVA provided in study                                                              | pes   | Two intervention groups were not separated out for analysis as variations of technological intervention. |
| Slegers et al, <sup>107</sup> 2008    | 57  | 133 | N/A   | +0.03 | <i>p</i> -value from repeated measures ANOVA provided in study                                            | pes   |                                                                                                          |
| Morgenstern et al, <sup>65</sup> 2015 | 112 | 122 | -0.08 | -0.18 | Mean differences and 95% CIs provided.                                                                    | mes   |                                                                                                          |

|                                     |    |    |       |       |                                                                        |     |                                                                          |
|-------------------------------------|----|----|-------|-------|------------------------------------------------------------------------|-----|--------------------------------------------------------------------------|
|                                     |    |    |       |       | Estimated SD from 95% confidence intervals for each group <sup>2</sup> |     |                                                                          |
| Dodge et al, <sup>105</sup> 2015    | 41 | 42 | -0.20 | -0.18 | Author provided mean differences and changes in SD                     | mes |                                                                          |
| Bond et al, <sup>62</sup> 2010      | 31 | 31 | +0.65 | +1.00 | SMD provided in study                                                  | des |                                                                          |
| Wan et al, <sup>60</sup> 2017       | 57 | 52 | +0.20 | +0.29 | Mean changes and SDs provided in study                                 | mes | No actual change in intervention group, just a decrease in control       |
| Bickmore et al, <sup>103</sup> 2005 | 8  | 9  | N/A   | +0.79 | t-statistic provided in study                                          | tes | Value used is for comparison of values post-intervention for both groups |

RMD = raw mean difference; SMD = standardized mean difference; SD = standard deviation; SE = standard error; CI = confidence interval; ANOVA = analysis of variance; ANCOVA = analysis of covariance

\*Sample sizes were derived from the number of participants that completed the trial for the most conservative estimates.

## References

1. Del Re A. compute.es: Compute Effect Sizes. <https://cran.r-project.org/web/packages/compute.es/index.html>. Published 2020. Accessed September 19, 2021.
2. Higgins JPT, Green S (editors). *Cochrane Handbook for Systematic Reviews of Interventions Version 5.1.0* [updated March 2011]. The Cochrane Collaboration, 2011. Available from [www.handbook.cochrane.org](http://www.handbook.cochrane.org).
3. Altman DG, Bland JM. How to obtain the P value from a confidence interval. *Bmj*. 2011 Aug 8;343.

**eTable 4.** Intervention and control arm characteristics of included studies

| <b>Author/Year</b>                   | <b>Intervention description</b>                                                                                                                                                                                        | <b>Control description</b>                         | <b>Duration of intervention</b> |
|--------------------------------------|------------------------------------------------------------------------------------------------------------------------------------------------------------------------------------------------------------------------|----------------------------------------------------|---------------------------------|
| <b>Animal assisted therapy</b>       |                                                                                                                                                                                                                        |                                                    |                                 |
| Banks et al, <sup>72</sup> 2008      | Living dog or robot dog                                                                                                                                                                                                | No animal assisted therapy                         | 8 weeks                         |
| Banks, and Banks, <sup>71</sup> 2005 | Animal assisted therapy once per week or three times per week                                                                                                                                                          | No animal assisted therapy                         | 6 weeks                         |
| Banks and Banks, <sup>70</sup> 2002  | Animal assisted therapy in a group setting                                                                                                                                                                             | Animal assisted therapy on a one on one basis      | 6 weeks                         |
| Jessen et al, <sup>75</sup> 1996     | A bird was placed in the room.                                                                                                                                                                                         | Routine care                                       | 10 days                         |
| Robinson et al, <sup>74</sup> 2013   | PARO interactive robot                                                                                                                                                                                                 | Bus trips around the city or an alternate activity | 12 weeks                        |
| Sollami et al, <sup>73</sup> 2017    | Animal therapy with a dog. Caregiving activities and teaching on physical interaction. Re-elaboration of the experience through recognition, images, and words.                                                        | Usual activities                                   | 8 weeks                         |
| <b>Therapy</b>                       |                                                                                                                                                                                                                        |                                                    |                                 |
| Cox et al, <sup>48</sup> 2007        | 1) Individual psychotherapy<br>2) Small-group psychotherapy<br>Includes psychosocial coping, self-care, communication, health and social services, working with caregivers, quality of life, and end-of-life decisions | Standard case management                           | 5 weeks                         |
| Jarvis et al, <sup>110</sup> 2019    | Cognitive behavioural therapy via WhatsApp (Living in Network Connected Communities)                                                                                                                                   | Usual care: generic wellness program for residents | 3 months                        |
| Li et al, <sup>63</sup> 2018         | Psychotherapy and family and community supports with health education                                                                                                                                                  | Health education only                              | 6 months                        |

|                                       |                                                                                                      |                                                                    |             |
|---------------------------------------|------------------------------------------------------------------------------------------------------|--------------------------------------------------------------------|-------------|
| Nelson et al, <sup>112</sup> 2019     | Psychotherapy                                                                                        | Social work calls                                                  | 7 weeks     |
| Parry et al, <sup>65</sup> 2016       | Cognitive behavioural therapy                                                                        | Usual care                                                         | 8 weeks     |
| Theeke et al, <sup>111</sup> 2016     | Cognitive behavioural therapy: LISTEN intervention                                                   | Attention control: educational sessions                            | 5 weeks     |
| Multi-component                       |                                                                                                      |                                                                    |             |
| Boen et al, <sup>57</sup> 2012        | Three hour meetings on addressing psychosocial problems (depression symptoms, loneliness, isolation) | Daily activities, offered the same group activities after one year | 35-38 weeks |
| Huang et al, <sup>59</sup> 2011       | 1) Combined: Tai Chi and CBT                                                                         | 1) Cognitive behavioural therapy only<br>2) No intervention        | 8 weeks     |
| Joubert et al, <sup>49</sup> 2013     | Combined: integrated management plan                                                                 | No intervention                                                    | 6 weeks     |
| Kapan et al, <sup>58</sup> 2017       | Combined: physical training and nutritional intervention                                             | Social meetings                                                    | 12 weeks    |
| Markle-Reid et al, <sup>64</sup> 2006 | Combined: home care and phone intervention                                                           | Usual home care                                                    | 6 months    |
| Ollongvist et al, <sup>52</sup> 2008  | Combined: rehabilitation program (group activities, education)                                       | Usual care                                                         | 3 weeks     |
| Saito et al, <sup>77</sup> 2012       | Combined: group based education, cognitive, and social support program                               | No intervention                                                    | 6 months    |
| Tse et al, <sup>78</sup> 2012         | Combined: physical exercise and arts and crafts                                                      | Regular care                                                       | 8 weeks     |
| Tse et al, <sup>79</sup> 2013         | Combined: nursing intervention, physiotherapy, and horticulture                                      | No intervention                                                    | 8 weeks     |
| Tse et al, <sup>80</sup> 2016         | Pain management program: physical exercise, interactive teaching, education with peer volunteers     | Weekly pain management program without peer volunteers             | 12 weeks    |

| Counseling                                |                                                                                                                         |                                                                                                                                                    |           |
|-------------------------------------------|-------------------------------------------------------------------------------------------------------------------------|----------------------------------------------------------------------------------------------------------------------------------------------------|-----------|
| Alaviani et al, <sup>86</sup> 2015        | Educational program on symptoms of loneliness, social relationships, interpersonal action, and motivation/self-efficacy | NR                                                                                                                                                 | 2 weeks   |
| Chow et al, <sup>81</sup> 2019            | Bereavement counseling                                                                                                  | Conventional loss-oriented intervention                                                                                                            | 8 weeks   |
| Cohen-Mansfield et al, <sup>82</sup> 2018 | Individual or group counseling                                                                                          | No social engagement                                                                                                                               | 6 months  |
| Estebansari et al, <sup>43</sup> 2018     | Eight sessions of restoration oriented and loss-components                                                              | Conventional loss-oriented orientation                                                                                                             | 8 weeks   |
| Kremers et al, <sup>84</sup> 2006         | Self-management counseling                                                                                              | No intervention                                                                                                                                    | 6 weeks   |
| Mountain et al, <sup>83</sup> 2017        | Lifestyle matters intervention                                                                                          | Standard care                                                                                                                                      | 4 months  |
| Routasalo et al, <sup>85</sup> 2009       | Psychosocial group sessions                                                                                             | No intervention                                                                                                                                    | 3 months  |
| Exercise                                  |                                                                                                                         |                                                                                                                                                    |           |
| Baez et al, <sup>88</sup> 2017            | Adapted OTAGO Exercise Program for falls prevention                                                                     | Home-based program without social/individual persuasion                                                                                            | 10 weeks  |
| Chan et al, <sup>90</sup> 2017            | Tai chi                                                                                                                 | Usual care                                                                                                                                         | 3 months  |
| Ehlers et al, <sup>87</sup> 2017          | Social dance program                                                                                                    | 1) Walk: walking sessions<br>2) Walk Plus: walking sessions and nutritional supplement<br>3) Strength, stretching, and stability exercise sessions | 24 weeks  |
| Jansons et al, <sup>67</sup> 2017         | Gym-based individualized exercise program                                                                               | Home-based exercise program                                                                                                                        | 12 months |

|                                      |                                                                               |                                               |           |
|--------------------------------------|-------------------------------------------------------------------------------|-----------------------------------------------|-----------|
| Jones et al, <sup>89</sup> 2019      | Exercise and walking                                                          | Group audiological rehabilitation only        | 10 weeks  |
| McAuley, et al <sup>50</sup> 2000    | Aerobic exercise intervention                                                 | Stretching and toning only                    | 6 months  |
| Tse et al, <sup>55</sup> 2014        | Physical exercise program                                                     | No treatment                                  | 8 weeks   |
| Wang et al, <sup>91</sup> 2010       | Group yoga                                                                    | Socialization only                            | 4 weeks   |
| Music therapy                        |                                                                               |                                               |           |
| Giovagnoli et al, <sup>66</sup> 2018 | Music therapy and acetylcholinesterase inhibitor                              | Acetylcholinesterase inhibitor only           | 24 weeks  |
| Johnson et al, <sup>92</sup> 2020    | Choir program                                                                 | Waitlist control                              | 6 months  |
| Yap et al, <sup>69</sup> 2017        | Rhythm wellness program                                                       | Waitlist control                              | 11 weeks  |
| Other/Miscellaneous                  |                                                                               |                                               |           |
| De Craen et al, <sup>93</sup> 2006   | Occupational therapy visit                                                    | Standard support from social services program | 24 months |
| Larsson et al, <sup>94</sup> 2016    | Client-based occupational therapy intervention process model                  | No intervention                               | 3 months  |
| Pynnönen et al, <sup>53</sup> 2018   | Combined: option of exercise, social activity program, or personal counseling | One counseling session, usual services        | 6 months  |
| Taube et al, <sup>54</sup> 2018      | Case management                                                               | Standard care                                 | 12 months |
| Reminiscence therapy                 |                                                                               |                                               |           |
| Chiang et al, <sup>95</sup> 2009     | Reminiscence therapy                                                          | Waitlist control                              | 8 weeks   |



|                                         |                                                                                     |                                                                          |           |
|-----------------------------------------|-------------------------------------------------------------------------------------|--------------------------------------------------------------------------|-----------|
| Moieni et al, <sup>97</sup> 2020        | Generativity reminiscence therapy: writing on life experiences                      | Writing on neutral topics                                                | 6 weeks   |
| Westerhof et al, <sup>96</sup> 2017     | Precious memories: autobiographical memory intervention                             | Individual unstructured contacts with a volunteer                        | 8 weeks   |
| Social intervention                     |                                                                                     |                                                                          |           |
| Andersson et al, <sup>100</sup> 1985    | Social group meetings                                                               | No intervention                                                          | 2 months  |
| Charlesworth et al, <sup>102</sup> 2008 | Befriender facilitator intervention                                                 | Standard services                                                        | 6 months  |
| Hartke and King, <sup>101</sup> 2003    | Telephone support group                                                             | Usual care                                                               | 8 weeks   |
| Heller et al, <sup>44</sup> 1991        | Telephone contact                                                                   | No intervention                                                          | 10 weeks  |
| MacIntyre et al, <sup>61</sup> 1999     | Friendly visitor program                                                            | No intervention                                                          | 6 weeks   |
| Mountain et al, <sup>99</sup> 2014      | Befriend one-to-one call                                                            | No treatment                                                             | 18 weeks  |
| Rook et al, <sup>98</sup> 2003          | Foster grandparent program                                                          | 1) Participation in meals and activity programming<br>2) No intervention | 2 years   |
| Walshe et al, <sup>56</sup> 2016        | Volunteer support intervention                                                      | Usual care                                                               | 8 weeks   |
| Technology                              |                                                                                     |                                                                          |           |
| Bickmore et al, <sup>103</sup> 2005     | Embodied conversational agents                                                      | Physical activity intervention                                           | 2 months  |
| Bond et al, <sup>62</sup> 2010          | Behavioural and motivation strategies, and problem-solving skills over the internet | Standard diabetes care                                                   | 6 months  |
| Czaja et al, <sup>104</sup> 2018        | PRISM software and connection to a PRISM buddy                                      | Binder with resources                                                    | 12 months |

|                                       |                                                                                                                          |                                                                          |           |
|---------------------------------------|--------------------------------------------------------------------------------------------------------------------------|--------------------------------------------------------------------------|-----------|
| Dodge et al, <sup>105</sup> 2015      | Video chat with trainer interviewers                                                                                     | Weekly telephone calls                                                   | 6 weeks   |
| Gustafson et al, <sup>76</sup> 2019   | CHESS system: motivation, decision making, stress reduction, and access to services                                      | Book for family caregivers for patients with dementia                    | 6 months  |
| Morgenstern et al, <sup>68</sup> 2015 | Medical assistance device                                                                                                | No medical alert device                                                  | 90 days   |
| Morton et al, <sup>46</sup> 2018      | EasyPC computer platform                                                                                                 | Care as usual                                                            | 3 months  |
| Nikitina et al, <sup>51</sup> 2018    | GymCentral program: tailored training, group exercise, persuasion, remote monitoring under supervision of a remote coach | Gym Central program with limited contacts to the coach                   |           |
| Sidner et al, <sup>106</sup> 2018     | AlwaysOn system<br>1) Robot<br>2) Virtual agent                                                                          | No intervention                                                          | 30 days   |
| Slegers et al, <sup>107</sup> 2008    | Computer training and personal computer with internet access                                                             | 1) Computer training, no intervention<br>2) No training, no intervention | 12 months |
| Tsai et al, <sup>108</sup> 2011       | Smartphone based videoconference program                                                                                 | NR                                                                       | 6 months  |
| Tsai et al, <sup>109</sup> 2020       | Videoconference interaction with family members                                                                          | Usual activities                                                         | 12 months |
| Wan et al, <sup>60</sup> 2017         | Pedometer plus website: goal-setting, feedback, disease education, online community forum                                | Pedometer alone and written materials about exercise                     | 13 weeks  |
| White et al, <sup>47</sup> 2002       | Small group internet training                                                                                            | Waitlist                                                                 | 22 weeks  |
| Woodward et al, <sup>45</sup> 2011    | Technology training                                                                                                      | No intervention                                                          | 6 months  |

Studies in which there are multiple arms are numbered in the control or intervention groups.

**eTable 5.** Reasons for exclusion from meta-analysis

| <b>Author</b>                         | <b>Reason for Exclusion</b>                                                                                                                                              | <b>Findings</b>                                 |
|---------------------------------------|--------------------------------------------------------------------------------------------------------------------------------------------------------------------------|-------------------------------------------------|
| Cox et al, <sup>48</sup> 2007         | Mixed long-term care with another setting                                                                                                                                | No difference in intervention vs. control       |
| Estebarsari et al, <sup>43</sup> 2018 | Insufficient quantitative data                                                                                                                                           | Benefit in intervention vs. control*            |
| Heller et al, <sup>44</sup> 1991      | Large variation in groups; data not divided by those who completely received and did not receive the intervention                                                        | No difference in intervention vs. control       |
| Joubert et al, <sup>49</sup> 2013     | Insufficient quantitative data                                                                                                                                           | Benefit in intervention vs. control             |
| McAuley et al, <sup>50</sup> 2000     | Insufficient quantitative data                                                                                                                                           | No difference between intervention vs. control  |
| Morton et al, <sup>46</sup> 2018      | Mixed long-term care with another setting                                                                                                                                | No difference between intervention vs. control  |
| Nikitina et al, <sup>51</sup> 2018    | Insufficient quantitative data                                                                                                                                           | No difference between intervention vs. control  |
| Ollongvist et al, <sup>52</sup> 2008  | Substitution methodology for drop-outs                                                                                                                                   | No difference between intervention vs. control) |
| Pynnönen et al, <sup>53</sup> 2018    | Intervention was selected by participants among three possible programs; this was not amenable to a single categorization. Data was not divided by type of intervention. | N/A (insufficient reporting)                    |
| Taube et al, <sup>54</sup> 2018       | Insufficient quantitative data                                                                                                                                           | No benefit in intervention vs. control          |
| Tse et al, <sup>55</sup> 2014         | Same data present from a separate study                                                                                                                                  | No benefit in intervention vs. control          |
| Walshe et al, <sup>56</sup> 2016      | Insufficient quantitative data                                                                                                                                           | No difference in intervention vs. control       |
| White et al, <sup>47</sup> 2002       | Mixed long-term care with another setting                                                                                                                                | No difference in intervention vs. control       |
| Woodward et al, <sup>45</sup> 2011    | Insufficient quantitative data                                                                                                                                           | No difference in intervention vs. control       |

\*Information describes the finding of the study with respect to the outcome of interest

**eTable 6:** Meta-analyses by intervention and sensitivity analyses

| Intervention                                                               | Loneliness |                      |                | No outliers |                      |                | No combined |                    |                | No active controls |                      |                | Social isolation |                     |                | Social support* |                    |                |
|----------------------------------------------------------------------------|------------|----------------------|----------------|-------------|----------------------|----------------|-------------|--------------------|----------------|--------------------|----------------------|----------------|------------------|---------------------|----------------|-----------------|--------------------|----------------|
|                                                                            | N          | Cohen's d (95% CI)   | I <sup>2</sup> | N           | Cohen's d (95% CI)   | I <sup>2</sup> | N           | Cohen's d (95% CI) | I <sup>2</sup> | N                  | Cohen's d (95% CI)   | I <sup>2</sup> | N                | Cohen's d (95% CI)  | I <sup>2</sup> | N               | Cohen's d (95% CI) | I <sup>2</sup> |
| <b>Animal therapy</b> <sup>70-75</sup>                                     |            |                      |                |             |                      |                |             |                    |                |                    |                      |                |                  |                     |                |                 |                    |                |
| <b>Community</b>                                                           | 2          | -0.41 (-1.75, 0.92)  | 87%            | N/A         | N/A                  | N/A            | N/A         | N/A                | N/A            | 1                  | 0.25 (-0.37, 0.88)   | N/A            | N/A              | N/A                 | N/A            | N/A             | N/A                | N/A            |
| <b>LTC</b>                                                                 | 4          | -1.05 (-2.93, 0.84)  | 95%            | N/A         | N/A                  | N/A            | N/A         | N/A                | N/A            | 3                  | -1.86 (-3.14, -0.59) | 86%            | N/A              | N/A                 | N/A            | N/A             | N/A                | N/A            |
| <b>Combined/Multi-Component interventions</b> <sup>57-60,63,64,76-80</sup> |            |                      |                |             |                      |                |             |                    |                |                    |                      |                |                  |                     |                |                 |                    |                |
| <b>Community</b>                                                           | 2          | -0.67 (-1.13, -0.21) | 0%             | N/A         | N/A                  | N/A            | N/A         | N/A                | N/A            | N/A                | N/A                  | N/A            | N/A              | N/A                 | N/A            | 6               | 0.29 (0.15, 0.43)  | 0%             |
| <b>LTC</b>                                                                 | 3          | -0.53 (-0.86, -0.20) | 57%            | N/A         | N/A                  | N/A            | N/A         | N/A                | N/A            | 1                  | -0.32 (-0.49, -0.15) | N/A            | N/A              | N/A                 | N/A            | N/A             | N/A                | N/A            |
| <b>Counselling</b> <sup>81-86</sup>                                        |            |                      |                |             |                      |                |             |                    |                |                    |                      |                |                  |                     |                |                 |                    |                |
| <b>Community</b>                                                           | 6          | -0.80 (-1.96, 0.36)  | 97%            | 5           | -0.19 (-0.35, -0.03) | 0%             | N/A         | N/A                | N/A            | 5                  | -0.93 (-2.32, 0.46)  | 97%            | N/A              | N/A                 | N/A            | N/A             | N/A                | N/A            |
| <b>LTC</b>                                                                 | N/A        | N/A                  | N/A            | N/A         | N/A                  | N/A            | N/A         | N/A                | N/A            | N/A                | N/A                  | N/A            | N/A              | N/A                 | N/A            | N/A             | N/A                | N/A            |
| <b>Exercise</b> <sup>57-59,67,78-80,87-91</sup>                            |            |                      |                |             |                      |                |             |                    |                |                    |                      |                |                  |                     |                |                 |                    |                |
| <b>Community</b>                                                           | 5          | -0.15 (-0.44, 0.15)  | 35%            | N/A         | N/A                  | N/A            | N/A         | N/A                | N/A            | 2                  | -0.45 (-0.86, -0.03) | 0%             | 1                | -0.12 (-0.55, 0.31) | N/A            | 3               | 0.17 (-0.07, 0.41) | 0%             |
| <b>LTC</b>                                                                 | 3          | -0.53 (-0.86, -0.20) | 57%            | N/A         | N/A                  | N/A            | N/A         | N/A                | N/A            | 1                  | -0.32 (-0.49, -0.15) | N/A            | N/A              | N/A                 | N/A            | N/A             | N/A                | N/A            |
| <b>Music</b> <sup>66,69,92</sup>                                           |            |                      |                |             |                      |                |             |                    |                |                    |                      |                |                  |                     |                |                 |                    |                |

|                                                                     |     |                      |     |     |                     |     |     |                     |     |     |                      |     |     |                     |     |     |                    |     |
|---------------------------------------------------------------------|-----|----------------------|-----|-----|---------------------|-----|-----|---------------------|-----|-----|----------------------|-----|-----|---------------------|-----|-----|--------------------|-----|
| <b>Community</b>                                                    | 1   | -0.34 (-0.55, -0.13) | N/A | N/A | N/A                 | N/A | N/A | N/A                 | N/A | N/A | N/A                  | N/A | 2   | -0.11 (-0.57, 0.35) | 0%  | N/A | N/A                | N/A |
| <b>LTC</b>                                                          | N/A | N/A                  | N/A | N/A | N/A                 | N/A | N/A | N/A                 | N/A | N/A | N/A                  | N/A | N/A | N/A                 | N/A | N/A | N/A                | N/A |
| <b>Occupational therapist guided interventions</b> <sup>93,94</sup> |     |                      |     |     |                     |     |     |                     |     |     |                      |     |     |                     |     |     |                    |     |
| <b>Community</b>                                                    | 2   | -0.63 (-1.96, 0.71)  | 90% | N/A | N/A                 | N/A | N/A | N/A                 | N/A | N/A | N/A                  | N/A | N/A | N/A                 | N/A | N/A | N/A                | N/A |
| <b>LTC</b>                                                          | N/A | N/A                  | N/A | N/A | N/A                 | N/A | N/A | N/A                 | N/A | N/A | N/A                  | N/A | N/A | N/A                 | N/A | N/A | N/A                | N/A |
| <b>Reminiscence therapy</b> <sup>95-97</sup>                        |     |                      |     |     |                     |     |     |                     |     |     |                      |     |     |                     |     |     |                    |     |
| <b>Community</b>                                                    | 1   | -0.70 (-1.17, -0.22) | N/A | N/A | N/A                 | N/A | N/A | N/A                 | N/A | N/A | N/A                  | N/A | N/A | N/A                 | N/A | N/A | N/A                | N/A |
| <b>LTC</b>                                                          | 2   | -0.40 (-1.98, 1.17)  | 95% | N/A | N/A                 | N/A | N/A | N/A                 | N/A | 1   | -1.20 (-1.65, -0.76) | N/A | N/A | N/A                 | N/A | N/A | N/A                |     |
| <b>Social</b> <sup>61,98-102</sup>                                  |     |                      |     |     |                     |     |     |                     |     |     |                      |     |     |                     |     |     |                    |     |
| <b>Community</b>                                                    | 5   | -0.02 (-0.21, 0.17)  | 7%  | N/A | N/A                 | N/A | N/A | N/A                 | N/A | 3   | 0.10 (-0.27, 0.48)   | 43% | N/A | N/A                 | N/A | 1   | 1.02 (0.13, 1.91)  |     |
| <b>LTC</b>                                                          | N/A | N/A                  | N/A | N/A | N/A                 | N/A | N/A | N/A                 | N/A | N/A | N/A                  | N/A | N/A | N/A                 | N/A | N/A | N/A                |     |
| <b>Technology</b> <sup>60,62,68,76,94,103-109</sup>                 |     |                      |     |     |                     |     |     |                     |     |     |                      |     |     |                     |     |     |                    |     |
| <b>Community</b>                                                    | 7   | -0.19 (-0.51, 0.14)  | 59% | 6   | -0.09 (-0.26, 0.07) | 10% | 6   | -0.15 (-0.53, 0.24) | 63% | 4   | -0.04 (-0.24, 0.17)  | 25% | 1   | -0.18 (-0.43, 0.08) | N/A | 2   | 0.62 (-0.07, 1.31) |     |
| <b>LTC</b>                                                          | 2   | -1.40 (-2.37, -0.44) | 70% | N/A | N/A                 | N/A | N/A | N/A                 | N/A | N/A | N/A                  | N/A | N/A | N/A                 | N/A | N/A | N/A                |     |
| <b>Therapy</b> <sup>63,65,110-112</sup>                             |     |                      |     |     |                     |     |     |                     |     |     |                      |     |     |                     |     |     |                    |     |
| <b>Community</b>                                                    | 4   | -0.52 (-1.21, 0.17)  | 83% | N/A | N/A                 | N/A | N/A | N/A                 | N/A | 3   | -0.46 (-1.39, 0.46)  | 86% | 1   | 0.16 (-0.06, 0.38)  | N/A | 1   | 0.41 (0.10, 0.72)  |     |
| <b>LTC</b>                                                          | N/A | N/A                  | N/A | N/A | N/A                 | N/A | N/A | N/A                 | N/A | N/A | N/A                  | N/A | N/A | N/A                 | N/A | N/A | N/A                |     |

\*a positive Cohen's  $d$  favors intervention

**eTable 7.** GRADE table of included studies

| Intervention             | Sub-interventions                                                                                                                            | Number of studies <sup>1</sup> |     | GRADE of evidence <sup>1</sup> |          |
|--------------------------|----------------------------------------------------------------------------------------------------------------------------------------------|--------------------------------|-----|--------------------------------|----------|
|                          |                                                                                                                                              | Community                      | LTC | Community                      | LTC      |
| Animal therapy           | Living dog<br>Robot dog/seal<br>Bird                                                                                                         | 2                              | 4   | Very low                       | Very low |
| Combined/Multi-component | Tai Chi and CBT<br>Integrated management, home care, rehabilitation, pain management<br>Physical training with nutrition, arts, horticulture | 2                              | 3   | Very low                       | Very low |
| Counseling               | Individual or group counseling on self-management, lifestyle, bereavement, psychosocial problems                                             | 6                              | N/A | Very Low                       | N/A      |
| Exercise                 | Tai chi or yoga<br>Dance<br>Physical exercise                                                                                                | 5                              | 3   | Very low                       | Very low |
| Music therapy            | Choir<br>Instruments: rhythm and melodic instruments                                                                                         | 1                              | N/A | Very low                       | N/A      |
| Occupational therapy     | Occupational therapy<br>Case management                                                                                                      | 2                              | N/A | Very low                       | N/A      |
| Reminiscence therapy     | N/A                                                                                                                                          | 1                              | 2   | Very low                       | Very low |
| Social intervention      | Social meetings, befriending, friendly visitor, volunteers<br>Telephone groups                                                               | 5                              | N/A | Very low                       | N/A      |
| Technology               | Conversational agents<br>Therapy over internet setting<br>Computer: platforms, programs, training<br>Videoconferencing                       | 7                              | 2   | Very low                       | Very low |

|         |                                               |   |     |          |     |
|---------|-----------------------------------------------|---|-----|----------|-----|
| Therapy | Psychotherapy<br>Cognitive behavioral therapy | 4 | N/A | Very low | N/A |
|---------|-----------------------------------------------|---|-----|----------|-----|

<sup>1</sup>Includes only studies with loneliness outcomes



**eTable 8.** Risk of bias table of included studies

| Author/Year                               | Randomization | Effect of assignment to intervention | Effect of adhering to intervention | Missing outcome data | Measurement of the outcome | Selection of reporting results | Overall risk of bias |
|-------------------------------------------|---------------|--------------------------------------|------------------------------------|----------------------|----------------------------|--------------------------------|----------------------|
| Alaviani et al, <sup>86</sup> 2015        | Unclear       | Unclear                              | High                               | Low                  | High                       | Unclear                        | High                 |
| Andersson, <sup>100</sup> 1985            | Low           | High                                 | High                               | High                 | High                       | High                           | High                 |
| Baez, M. et al, <sup>88</sup> 2017        | Unclear       | High                                 | High                               | High                 | High                       | Unclear                        | High                 |
| Banks, <sup>72</sup> 2008                 | Low           | High                                 | High                               | High                 | High                       | Unclear                        | High                 |
| Banks, and Banks, <sup>71</sup> 2005      | Unclear       | High                                 | High                               | High                 | High                       | High                           | High                 |
| Banks, <sup>70</sup> 2002                 | Low           | Unclear                              | High                               | Low                  | High                       | Unclear                        | High                 |
| Bickmore et al, <sup>103</sup> 2005       | Unclear       | Unclear                              | High                               | High                 | High                       | High                           | High                 |
| Boen et al, <sup>57</sup> 2012            | High          | High                                 | High                               | High                 | High                       | High                           | High                 |
| Bond et al, <sup>62</sup> 2010            | Low           | Unclear                              | Unclear                            | Low                  | High                       | High                           | High                 |
| Chan et al, <sup>90</sup> 2017            | Low           | High                                 | High                               | High                 | High                       | High                           | High                 |
| Charlesworth et al, <sup>102</sup> 2008   | Unclear       | High                                 | High                               | High                 | High                       | High                           | High                 |
| Chow et al, <sup>81</sup> 2019            | Unclear       | Unclear                              | Unclear                            | High                 | Unclear                    | High                           | High                 |
| Cohen-Mansfield et al, <sup>82</sup> 2018 | Unclear       | High                                 | High                               | High                 | High                       | High                           | High                 |
| Cox et al, <sup>48</sup> 2007             | Unclear       | High                                 | High                               | Low                  | High                       | High                           | High                 |
| Czaja et al, <sup>104</sup> 2018          | High          | Unclear                              | High                               | High                 | High                       | High                           | High                 |

|                                          |         |         |         |          |         |         |         |
|------------------------------------------|---------|---------|---------|----------|---------|---------|---------|
| De Craen et al, <sup>93</sup><br>2006    | Low     | Unclear | Low     | Unclears | High    | High    | High    |
| Dodge et al, <sup>105</sup><br>2015      | Low     | Unclear | High    | Low      | High    | Low     | High    |
| Ehlers et al, <sup>87</sup><br>2017      | Low     | High    | High    | High     | High    | High    | High    |
| Estebarsari et al, <sup>43</sup><br>2018 | High    | High    | Unclear | High     | Unclear | High    | High    |
| Giovagnoli et<br>al, <sup>66</sup> 2018  | Low     | Unclear | High    | High     | High    | High    | High    |
| Gustafson et<br>al, <sup>76</sup> 2019   | Unclear | High    | High    | High     | High    | High    | High    |
| Hartke and<br>King, <sup>101</sup> 2003  | High    | High    | High    | High     | High    | High    | High    |
| Heller et al, <sup>44</sup><br>1991      | Unclear | Unclear | High    | High     | High    | High    | High    |
| Huang et al, <sup>59</sup><br>2011       | Low     | Unclear | High    | Low      | High    | High    | High    |
| Jansons et al, <sup>67</sup><br>2017     | Unclear | Unclear | High    | High     | High    | High    | High    |
| Jarvis et al, <sup>110</sup><br>2019     | Low     | Unclear | High    | Low      | High    | High    | High    |
| Jessen et al, <sup>75</sup><br>1996      | Unclear | Unclear | High    | Low      | High    | Unclear | High    |
| Johnson et al, <sup>92</sup><br>2020     | Unclear | Unclear | Unclear | High     | Unclear | Low     | Unclear |
| Jones et al, <sup>89</sup><br>2019       | Unclear | Unclear | High    | Low      | High    | High    | High    |
| Joubert et al, <sup>49</sup><br>2013     | High    | High    | High    | High     | High    | Unclear | High    |
| Kapan et al, <sup>58</sup><br>2017       | Unclear | Unclear | High    | Low      | High    | Low     | High    |

|                                          |         |         |         |         |         |         |      |
|------------------------------------------|---------|---------|---------|---------|---------|---------|------|
| Kremers et al, <sup>84</sup><br>2006     | Unclear | Unclear | Unclear | High    | High    | Unclear | High |
| Larsson et al, <sup>94</sup><br>2016     | High    | High    | High    | Low     | Unclear | High    | High |
| Li et al, <sup>63</sup> 2018             | Unclear | Unclear | Unclear | High    | Unclear | High    | High |
| MacIntyre et<br>al, <sup>61</sup> 1999   | Unclear | Unclear | High    | Low     | High    | Unclear | High |
| Markle-Reid et<br>al, <sup>64</sup> 2006 | Low     | High    | High    | High    | High    | High    | High |
| McAuley et al, <sup>50</sup><br>2000     | Unclear | Unclear | High    | High    | High    | Unclear | High |
| Moieni et al, <sup>97</sup><br>2020      | Unclear | High    | High    | High    | High    | High    | High |
| Morgenstern et<br>al, <sup>68</sup> 2015 | Low     | High    | High    | High    | High    | High    | High |
| Morton et al, <sup>46</sup><br>2018      | Unclear | Unclear | High    | Low     | High    | High    | High |
| Mountain et al, <sup>99</sup><br>2014    | Low     | Unclear | Unclear | Low     | High    | High    | High |
| Mountain et al, <sup>83</sup><br>2017    | Low     | High    | Unclear | Low     | High    | High    | High |
| Nelson et al, <sup>112</sup><br>2019     | Low     | Unclear | High    | Unclear | High    | Low     | High |
| Nikitina et al, <sup>51</sup><br>2018    | Unclear | High    | High    | High    | High    | High    | High |
| Ollongvist et<br>al, <sup>52</sup> 2008  | Unclear | High    | High    | High    | High    | High    | High |
| Parry et al, <sup>65</sup><br>2016       | Unclear | Unclear | High    | Unclear | High    | High    | High |
| Pynnönen et<br>al, <sup>53</sup> 2018    | Unclear | High    | High    | High    | High    | High    | High |
| Robinson et al, <sup>74</sup><br>2013    | High    | Unclear | High    | High    | High    | Unclear | High |

|                                        |         |         |         |         |         |         |         |
|----------------------------------------|---------|---------|---------|---------|---------|---------|---------|
| Rook et al, <sup>98</sup><br>2003      | High    | Unclear | High    | High    | High    | High    | High    |
| Routasalo et<br>al, <sup>85</sup> 2009 | Low     | Unclear | High    | High    | Unclear | High    | High    |
| Saito et al, <sup>77</sup><br>2012     | Unclear | Unclear | High    | High    | High    | High    | High    |
| Sidner et al, <sup>106</sup><br>2018   | Unclear | High    | High    | High    | High    | Unclear | High    |
| Slegers et al,<br>2008                 | Unclear | High    | High    | High    | High    | High    | High    |
| Sollami et al, <sup>107</sup><br>2017  | Low     | Unclear | High    | Low     | High    | Unclear | High    |
| Taube et al, <sup>54</sup><br>2018     | Low     | Unclear | High    | High    | High    | High    | High    |
| Theeke et al, <sup>111</sup><br>2016   | Unclear | High    | High    | High    | High    | High    | High    |
| Tsai et al, <sup>108</sup><br>2011     | High    | High    | Unclear | High    | Unclear | High    | High    |
| Tsai. et al, <sup>109</sup><br>2020    | Unclear | Unclear | Unclear | High    | Unclear | High    | High    |
| Tse et al, <sup>78</sup> 2012          | Unclear | Unclear | Unclear | Low     | Unclear | Low     | Unclear |
| Tse et al, <sup>79</sup> 2013          | High    | Low     | Unclear | Low     | Unclear | Low     | High    |
| Tse et al, <sup>55</sup> 2014          | High    | High    | Unclear | Low     | High    | Low     | High    |
| Tse et al, <sup>80</sup> 2016          | High    | Low     | Unclear | Unclear | High    | Low     | High    |
| Walshe et al, <sup>56</sup><br>2016    | Low     | Unclear | High    | Low     | High    | High    | High    |
| Wan et al, <sup>60</sup><br>2017       | Low     | Unclear | Low     | Low     | High    | Low     | Unclear |
| Wang et al, <sup>91</sup><br>2010      | High    | High    | High    | High    | High    | High    | High    |
| Westerhof et<br>al, <sup>96</sup> 2017 | Unclear | Unclear | High    | Low     | High    | High    | High    |

|                                    |         |      |      |      |         |         |      |
|------------------------------------|---------|------|------|------|---------|---------|------|
| White et al, <sup>47</sup> 2002    | Unclear | High | High | High | High    | Unclear | High |
| Woodward et al, <sup>45</sup> 2011 | Unclear | High | High | High | High    | High    | High |
| Yap et al, <sup>69</sup> 2017      | Low     | High | High | High | Unclear | High    | High |

**eFigure 1.** Funnel plot analysis of studies included in meta-analysis  
**a) Animal therapy: Community**

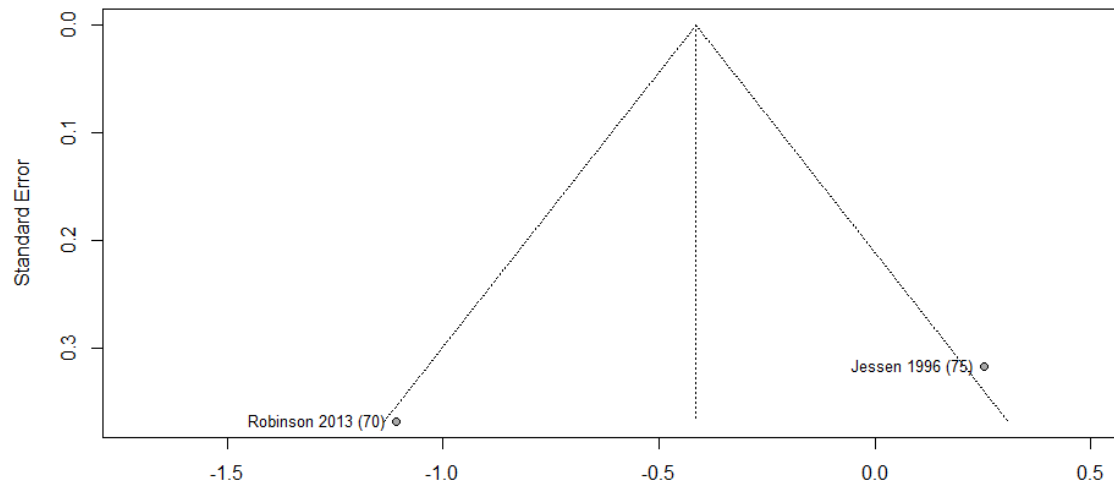

**b) Animal therapy: LTC**

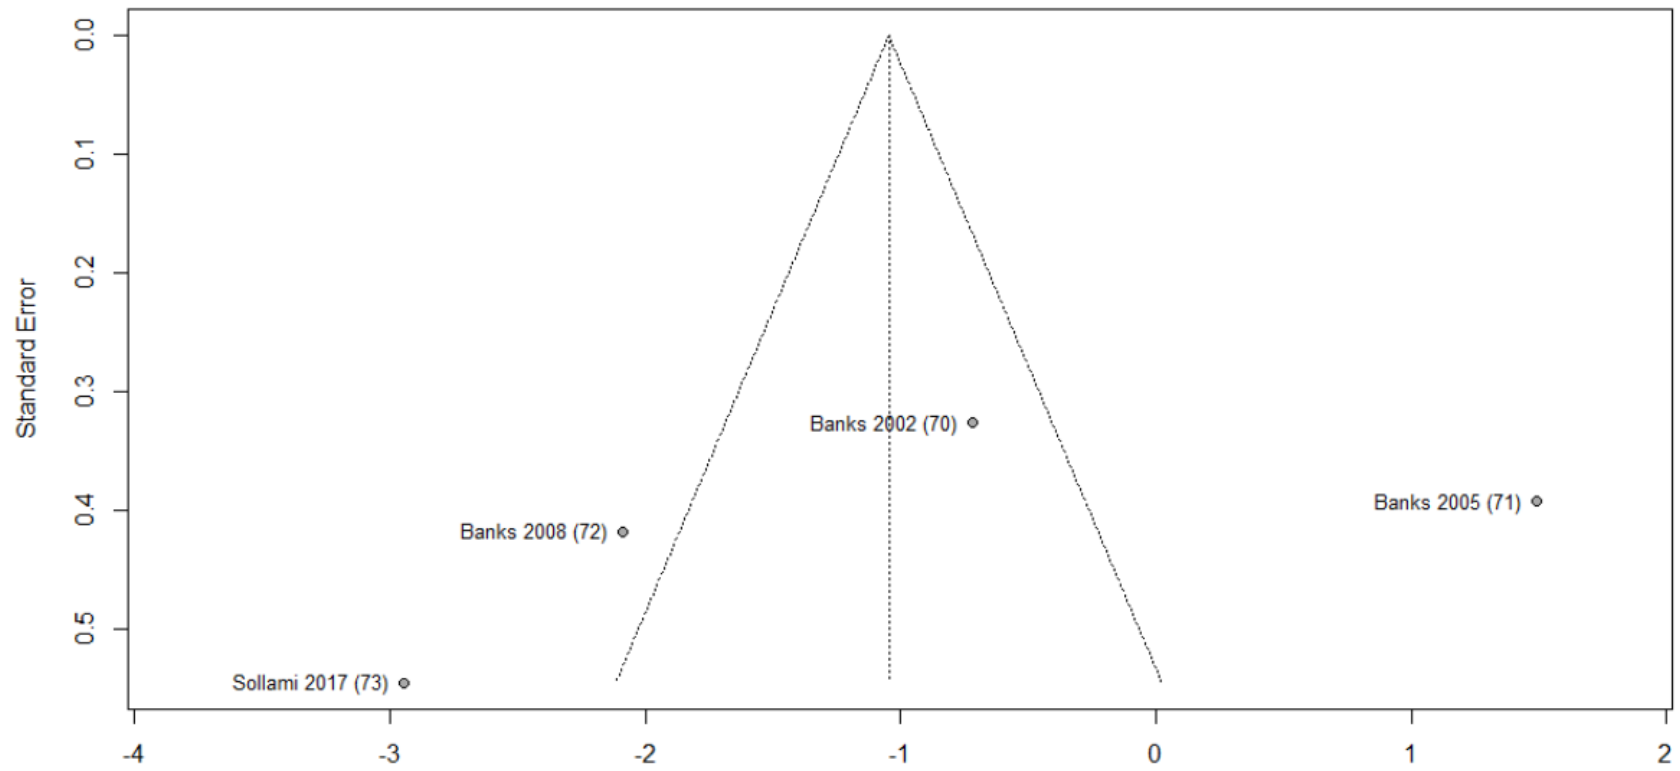

c) Combined/Multi-component: community

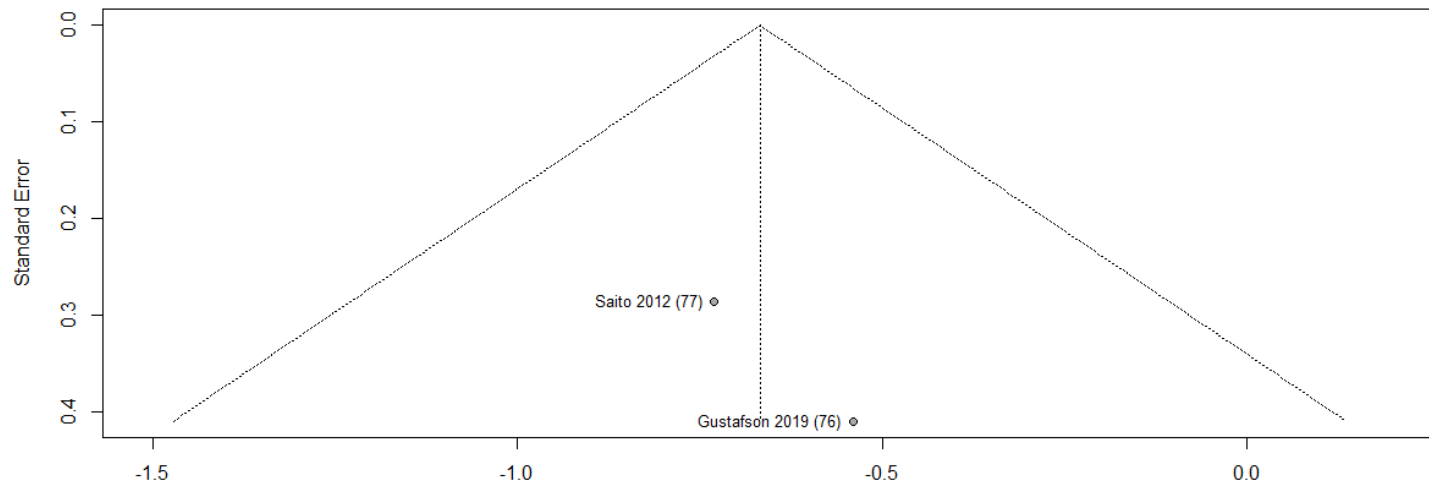



**d) Combined/Multi-component: LTC**

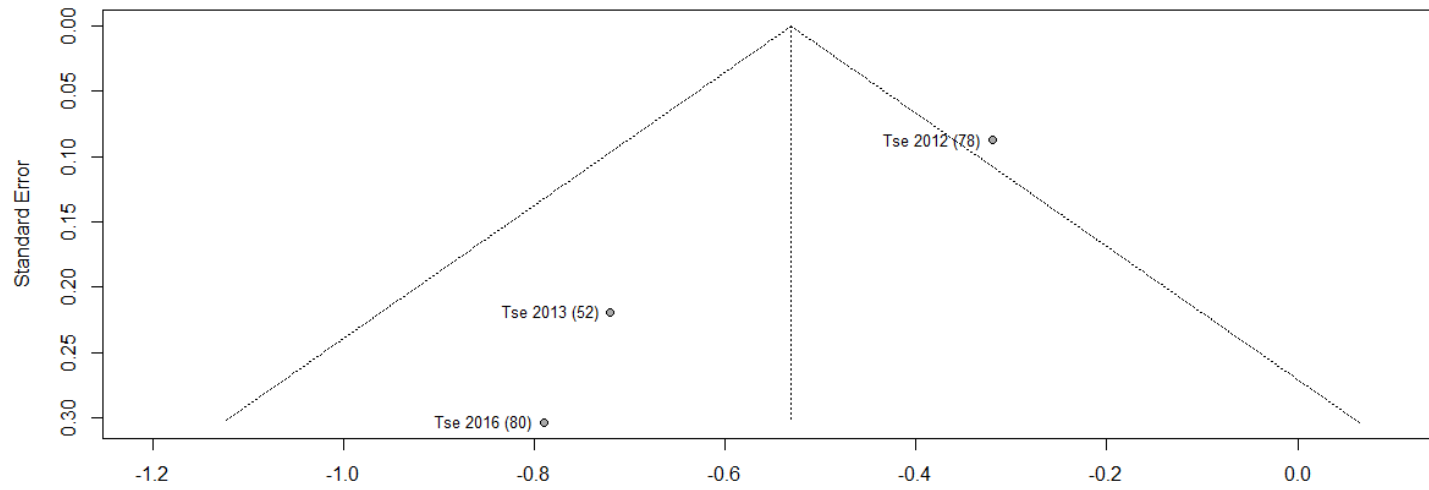

e) Counselling: community

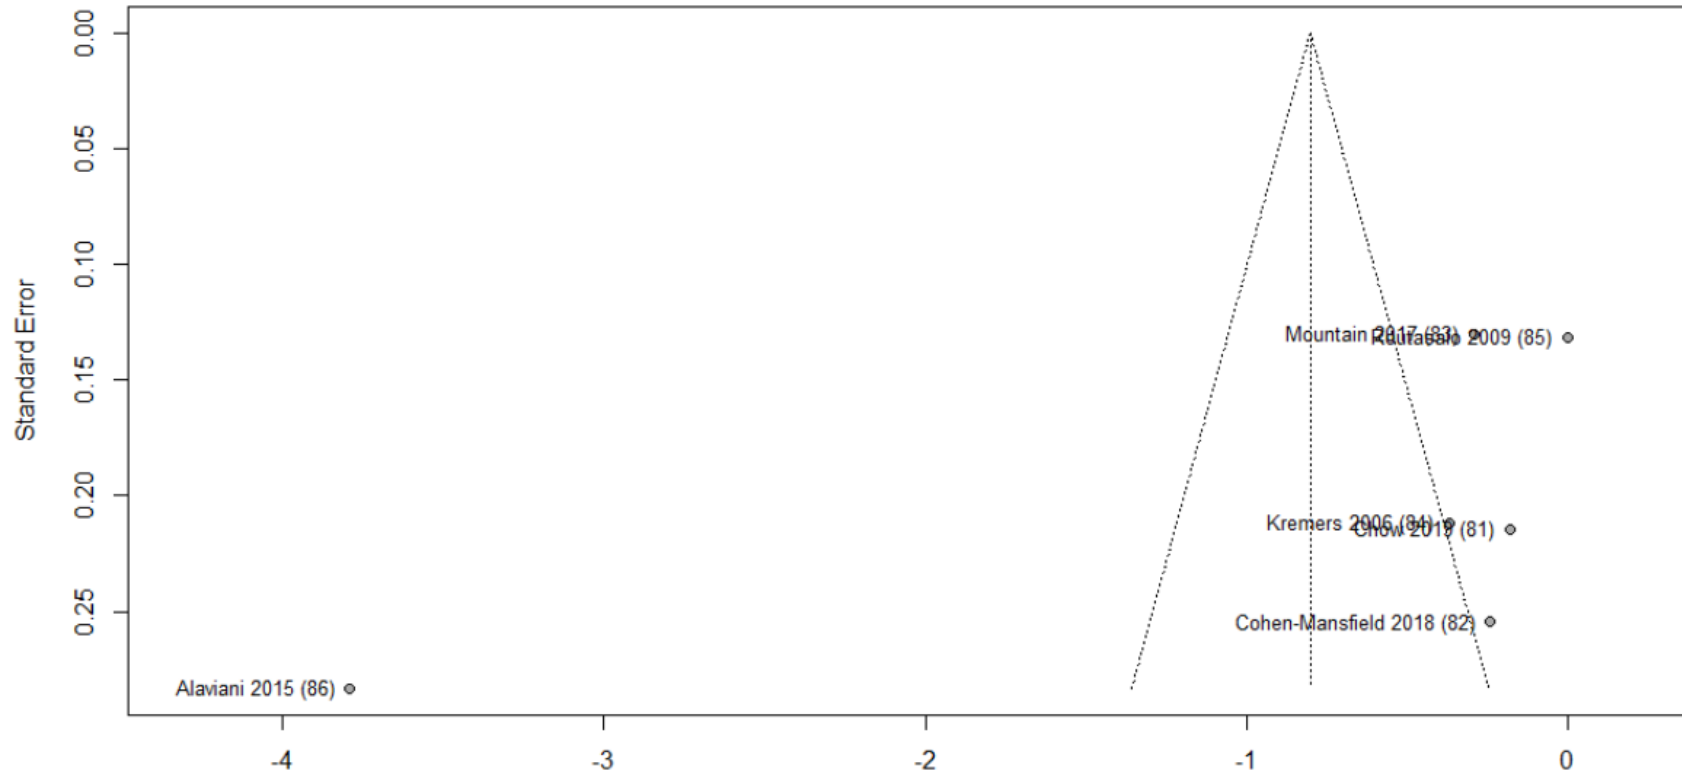

f) Exercise: community

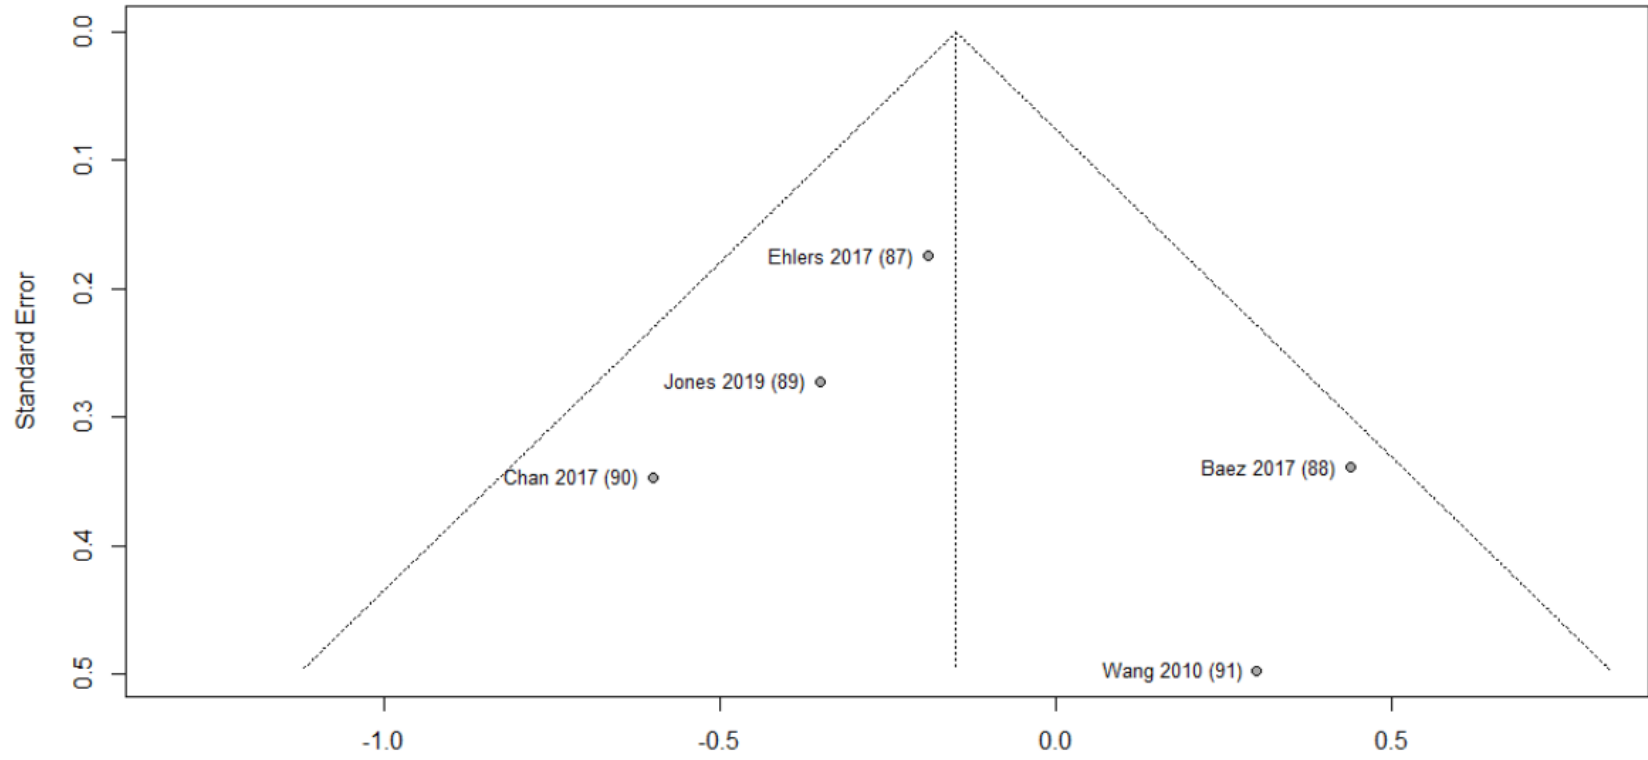

**g) Exercise: LTC**

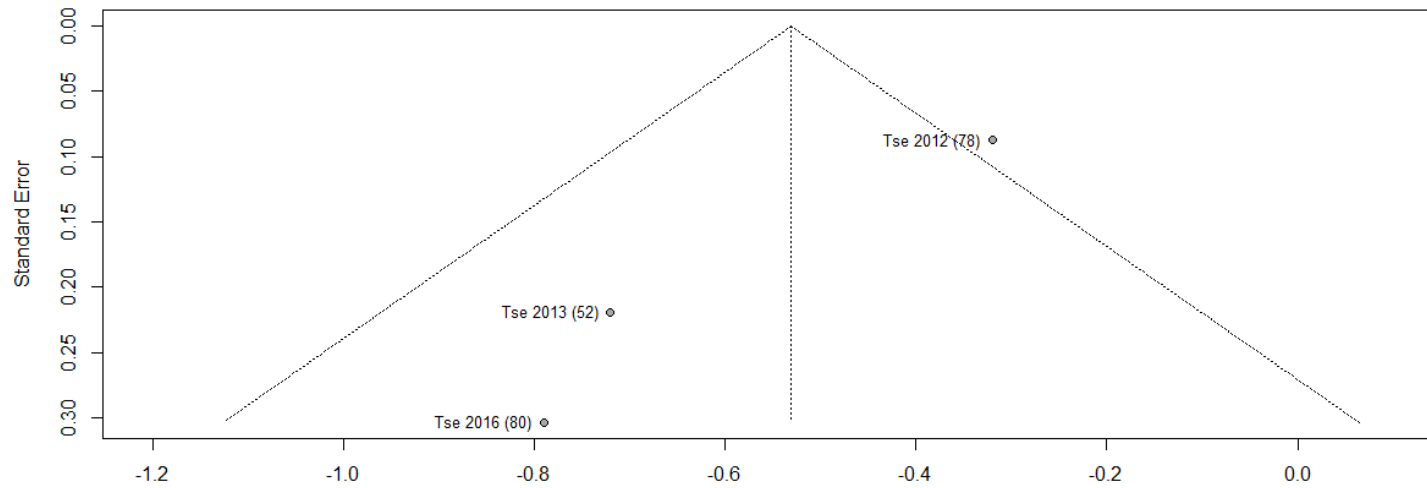

### h) Occupational therapy: community

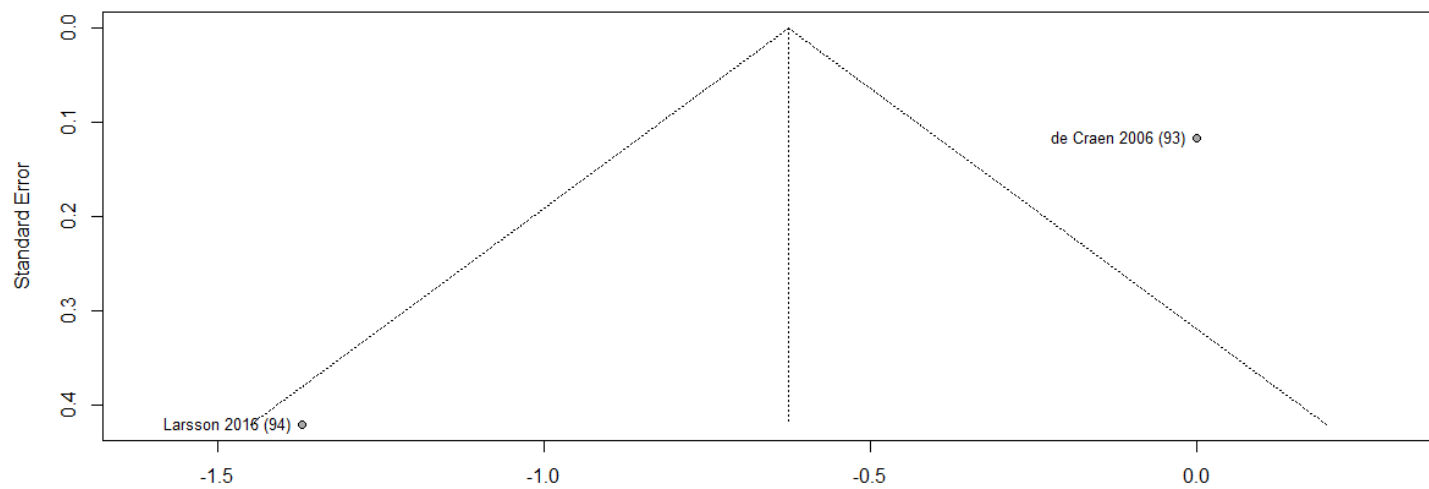

**i) Reminiscence therapy: LTC**

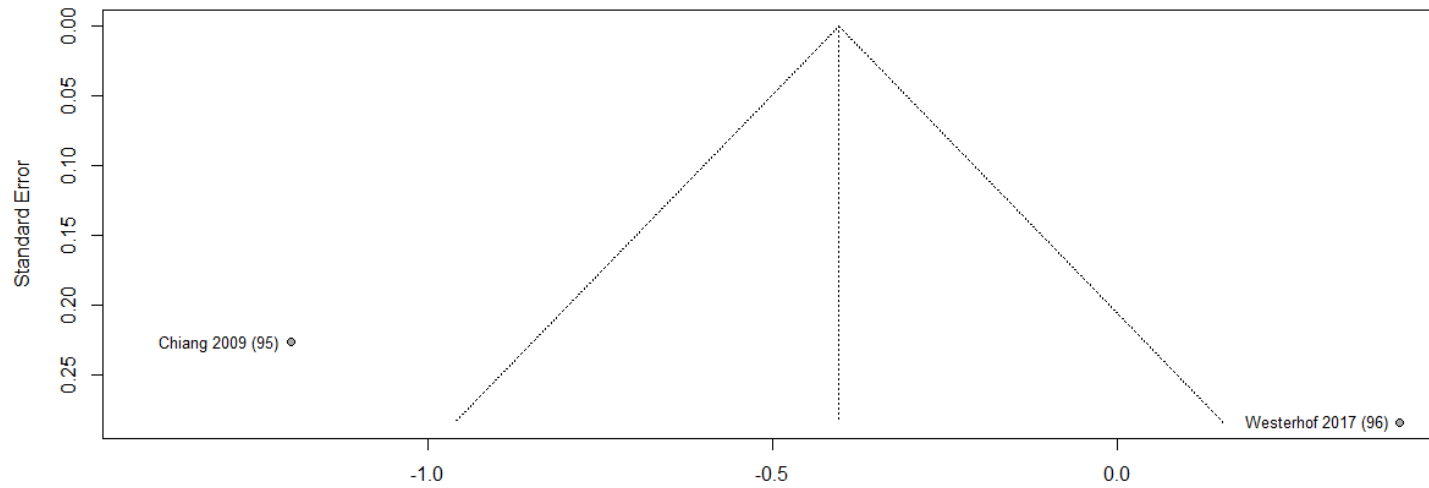

**j) Social intervention: community**

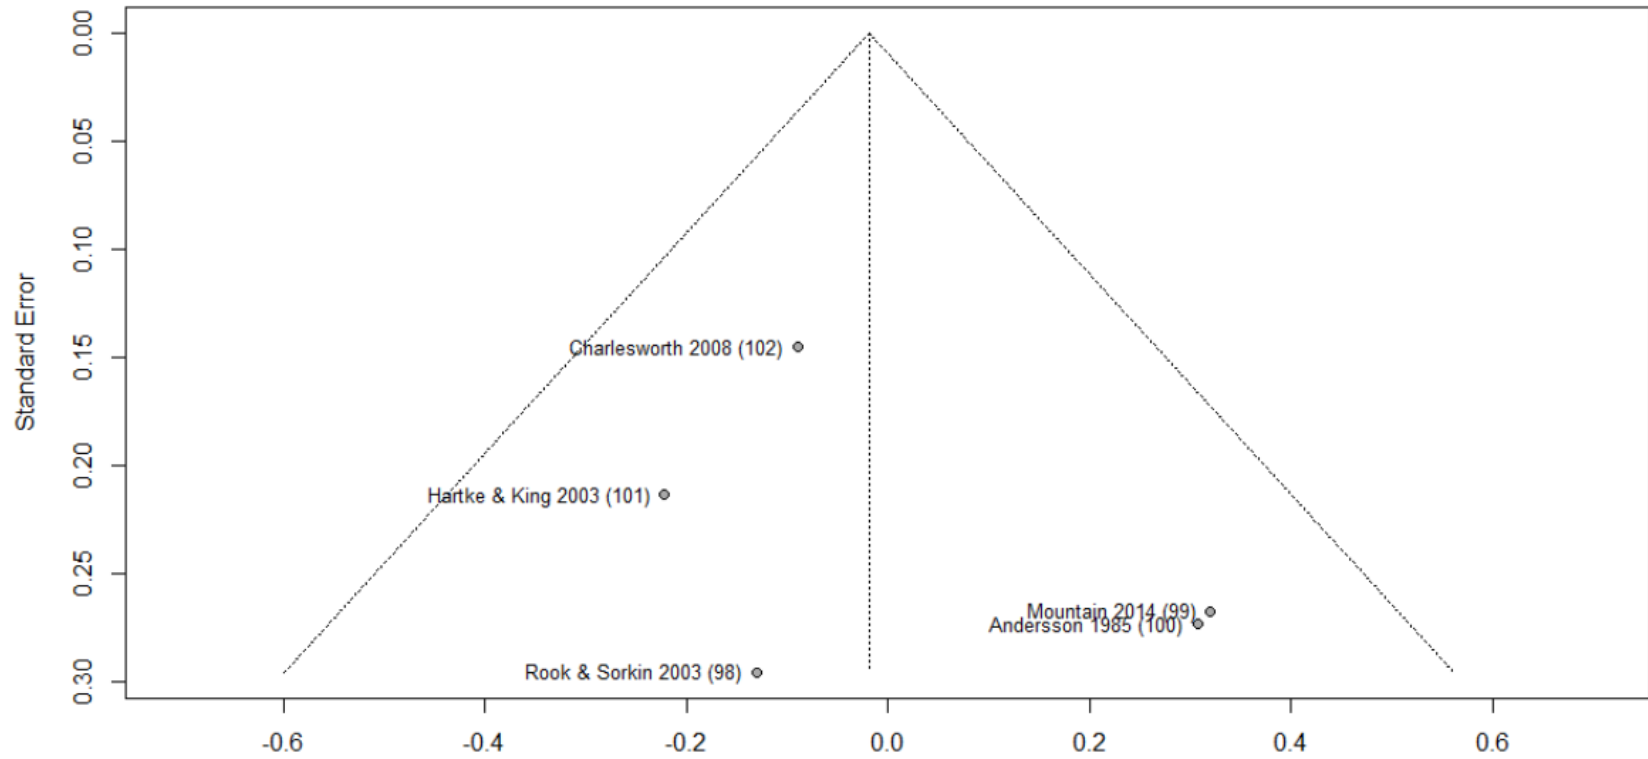

**k) Technology: community**

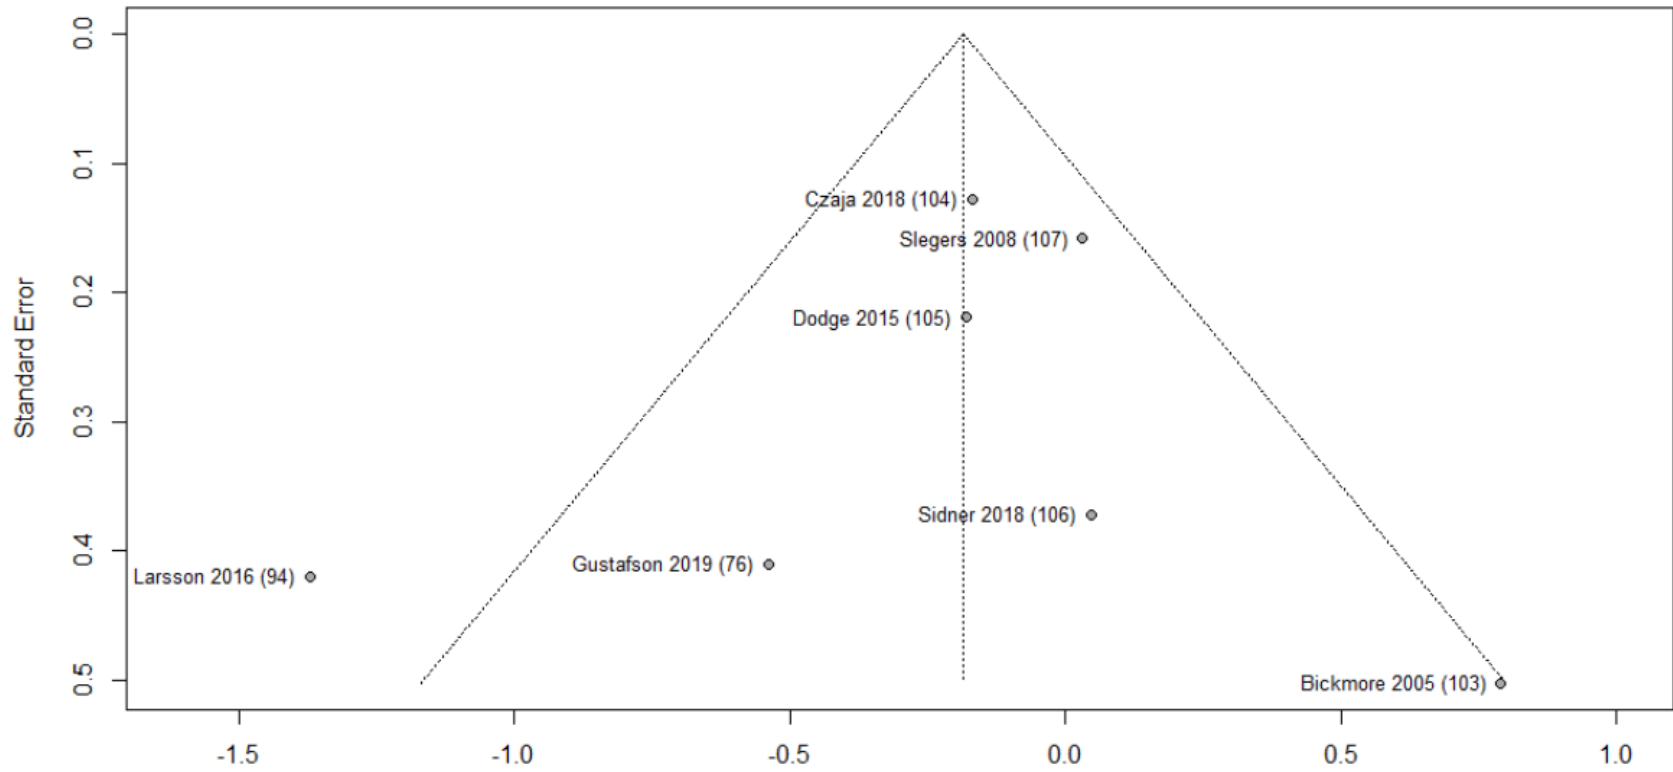



I) Technology: LTC

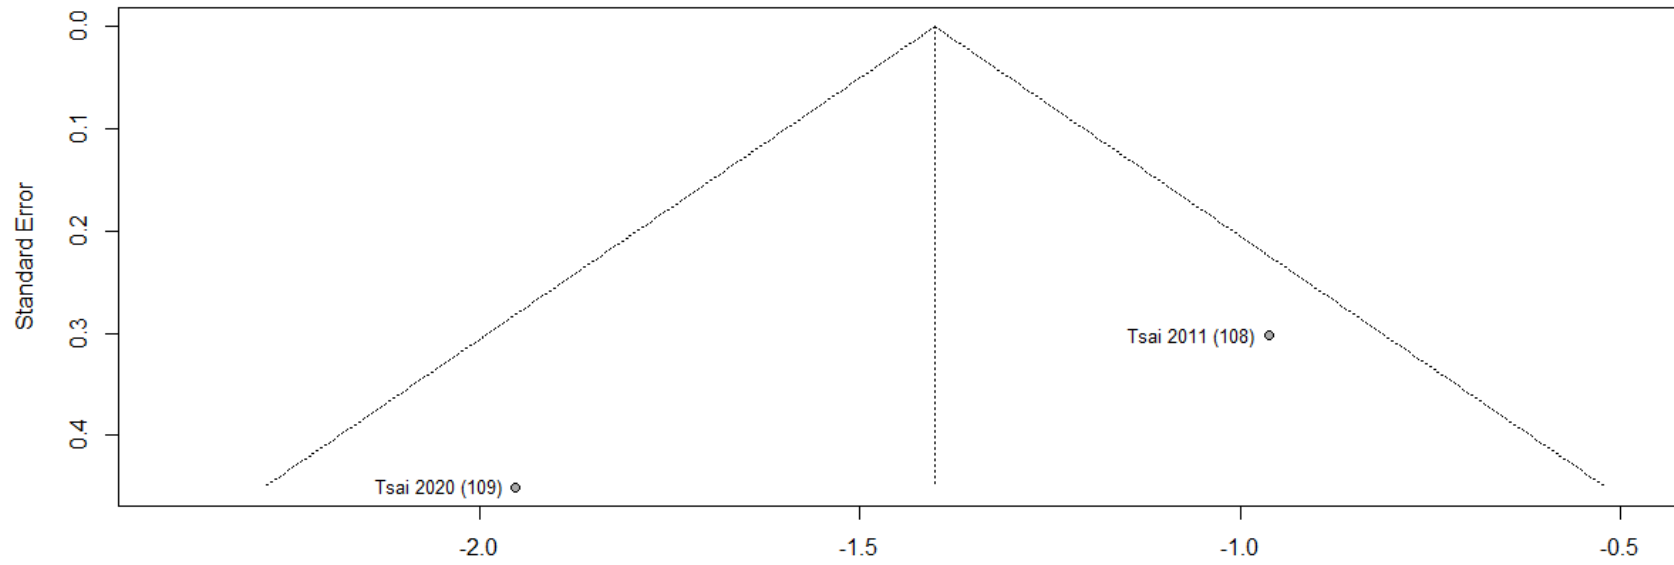

**m) Therapy: community**

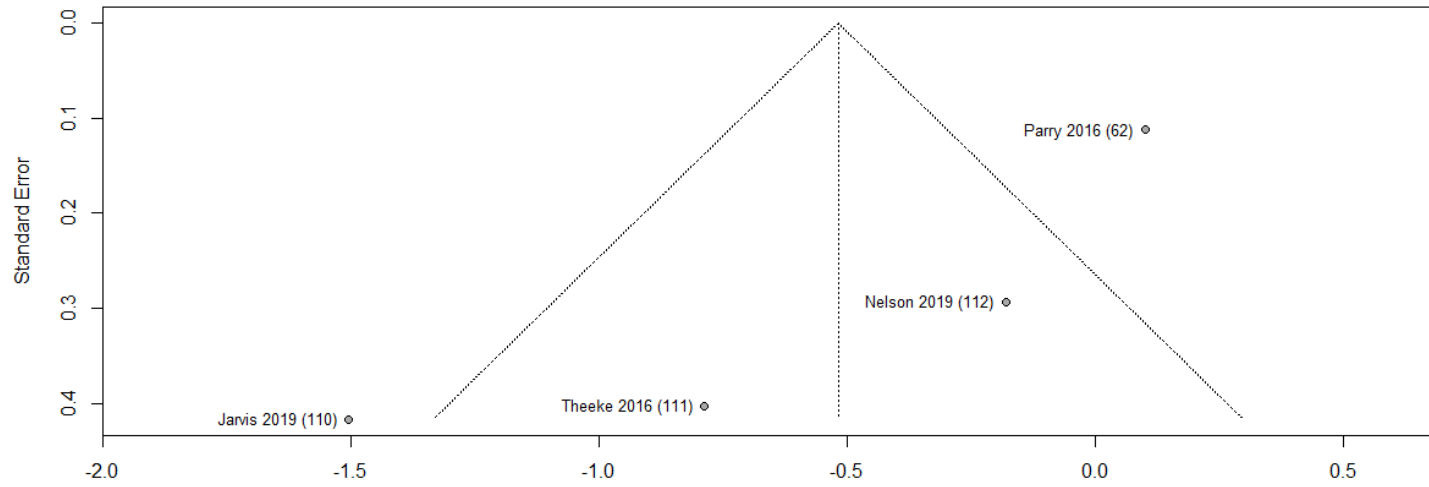

a) Animal therapy: Community

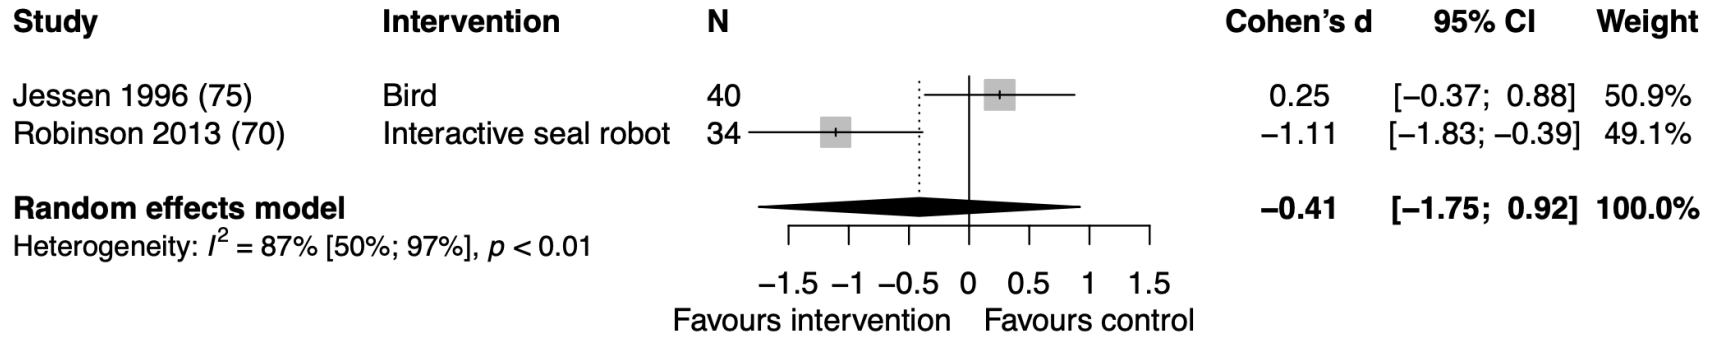

**b) Combined/Multi-component: Community**

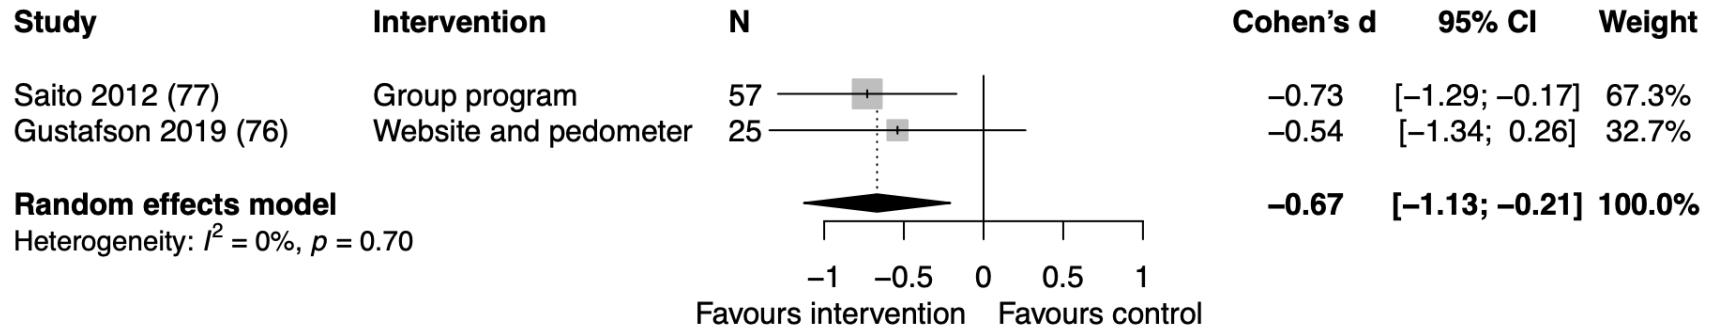

c) Music therapy: Community

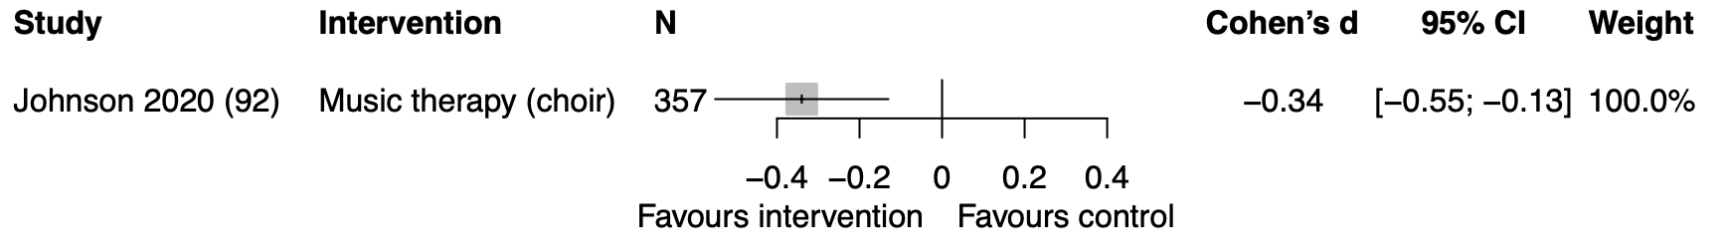

**d) Occupational therapy: Community**

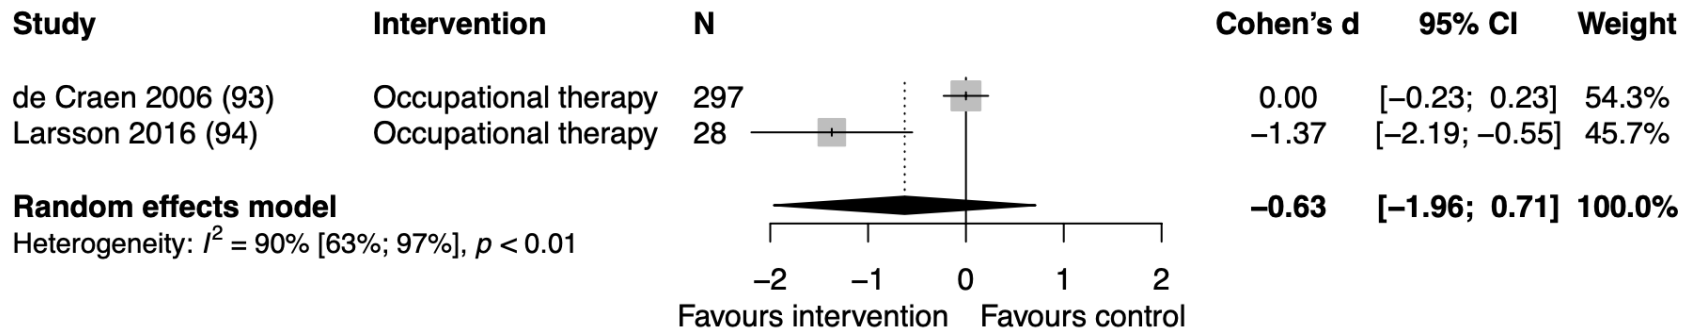

e) Reminiscence therapy: Community

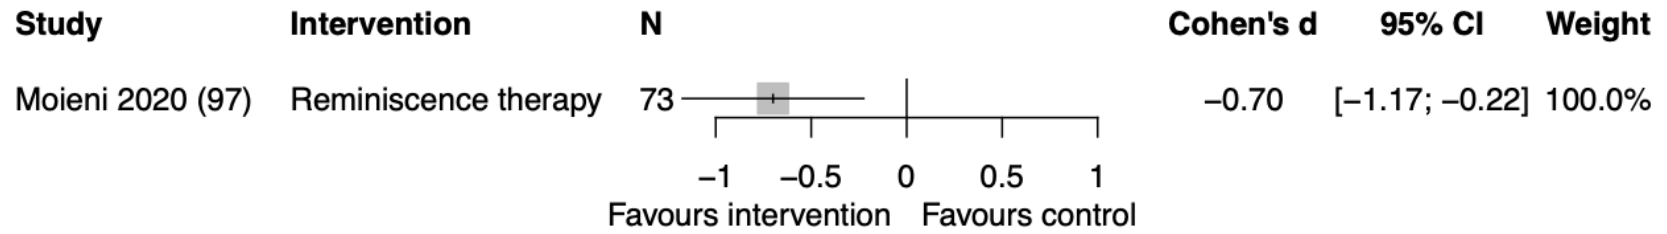

f) Reminiscence therapy: LTC

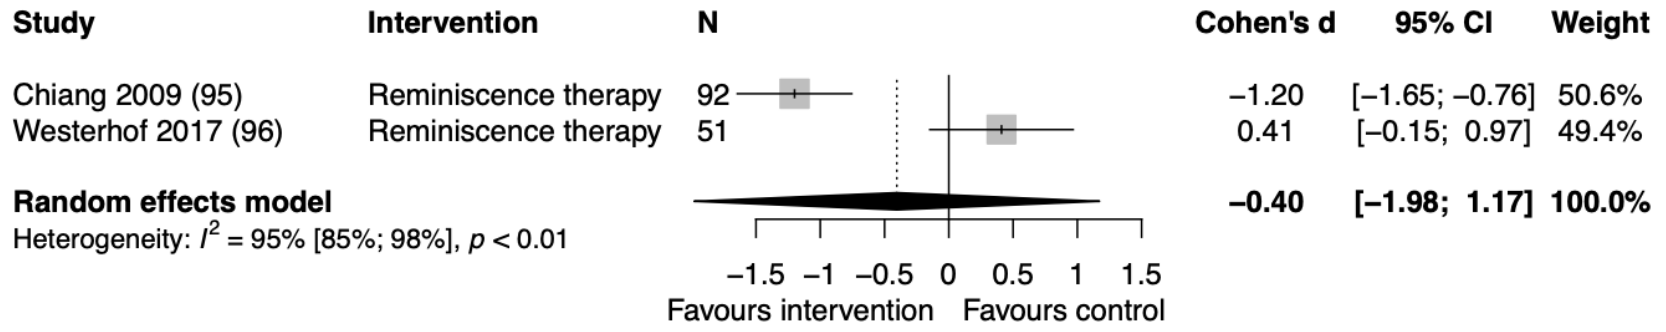



**eFigure 2: Risk of bias assessment of studies included in the systematic review.**

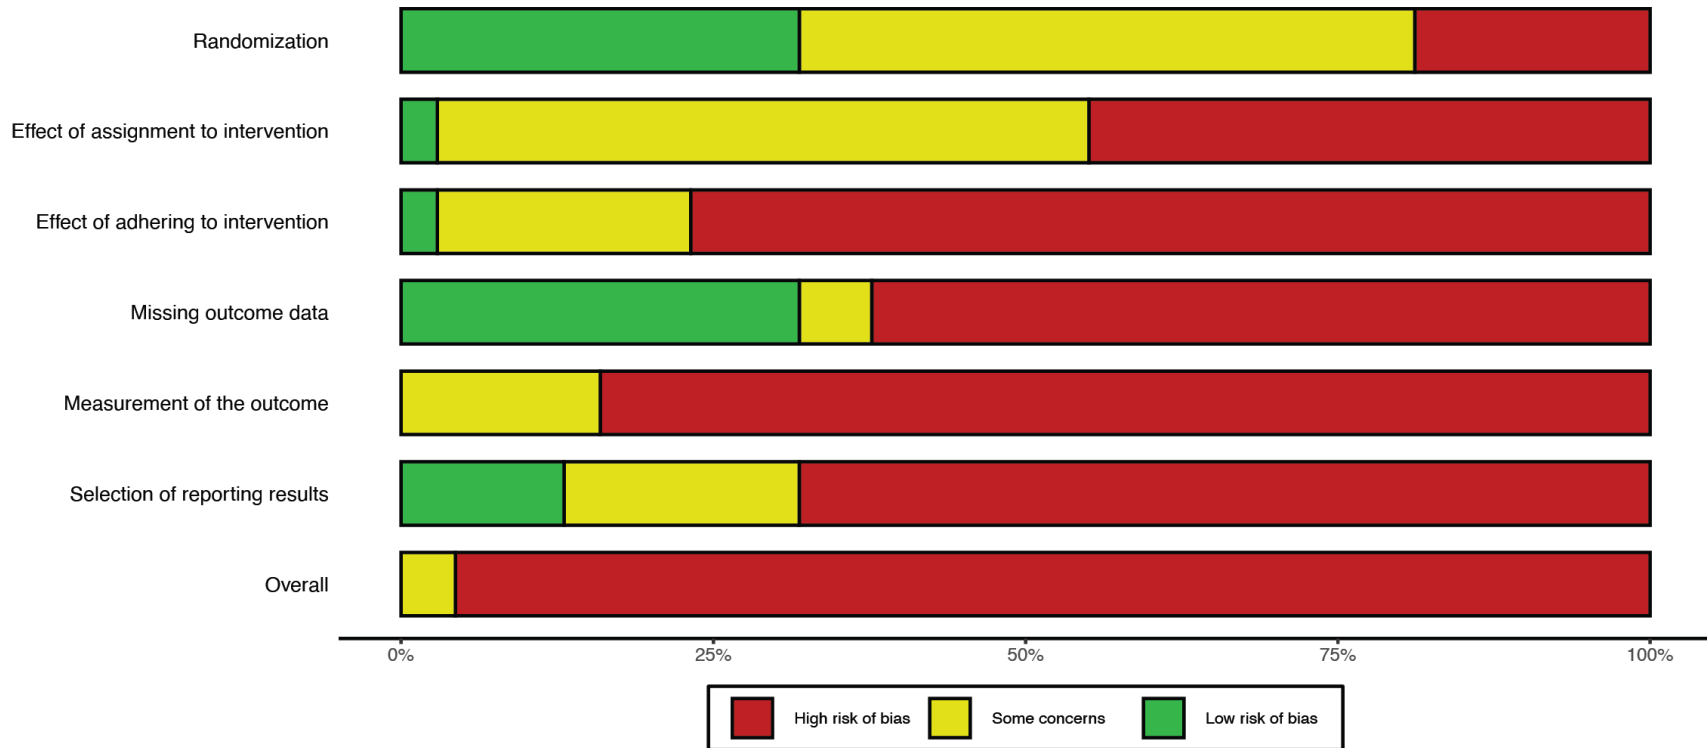

Supplement: jamanetwopen-e2236676-s001.pdf [file jamanetwopen-e2236676-s001.pdf]
